# Supplementary material for: Single-Copy Genes as Molecular Markers for Phylogenomic Studies in Seed Plants
Source: Oxford University Press journal article supplement (doi:10.1093/gbe/evx070), 2017-04-26
Supplement: evx070_Supp.pdf [file evx070_Supp.pdf]

# Single-copy genes as molecular markers for phylogenomic studies in seed plants

## - Supplementary Materials -

Zhen Li<sup>1,2,3</sup>, Amanda R. De La Torre<sup>4,5</sup>, Lieven Sterck<sup>1,2,3</sup>, Francisco M. Canovas<sup>6</sup>, Concepcion Avila<sup>6</sup>, Irene Merino Sierra<sup>7</sup>, José Antonio Cabezas<sup>8</sup>, María Teresa Cervera<sup>8</sup>, Pär K. Ingvarsson<sup>4,9</sup>, Yves Van de Peer<sup>1,2,3,10,\*</sup>

<sup>1</sup> Department of Plant Biotechnology and Bioinformatics, Ghent university, Technologiepark 927, 9052 Ghent, Belgium

<sup>2</sup> Center for Plant Systems Biology, VIB, Technologiepark 927, 9052 Ghent, Belgium

<sup>3</sup> Bioinformatics Institute Ghent, Technologiepark 927, 9052 Ghent, Belgium

<sup>4</sup> Department of Ecology and Environmental Science, Umeå University, Linneaus väg 6, SE-90187 Umeå, Sweden

<sup>5</sup> Department of Plant Sciences, University of California Davis, Davis CA 95616, USA.

<sup>6</sup> Departamento de Biología Molecular y Bioquímica, Facultad de Ciencias, Instituto Andaluz de Biotecnología, Universidad de Málaga, Campus Universitario de Teatinos s/n, 29071 Málaga, Spain

<sup>7</sup> Department of Plant Biology, Uppsala BioCenter, Swedish University of Agricultural Sciences and the Linnean Center for Plant Biology, PO-Box 7080, SE-75007 Uppsala, Sweden

<sup>8</sup> INIA, Center Forest Research (CIFOR), E-28040 Madrid, Spain

<sup>9</sup> Umeå Plant Centre, SE-90187, Umeå, Sweden

<sup>10</sup> Genomics Research Institute, University of Pretoria, Hatfield Campus, Pretoria 0028, South Africa.

\* Author for correspondence: Yves Van de Peer ([yves.vandeppeer@psb.vib-ugent.be](mailto:yves.vandeppeer@psb.vib-ugent.be))

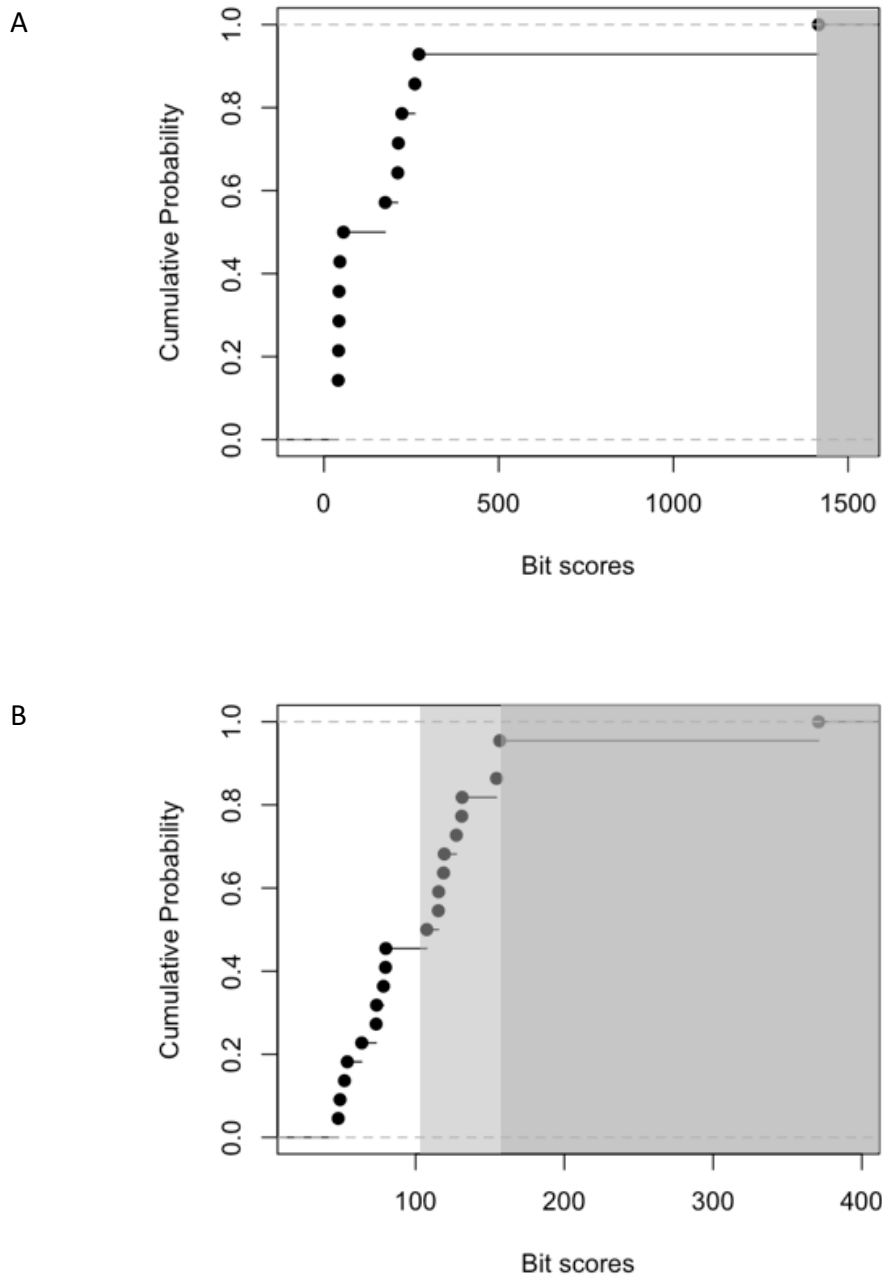

**Supplementary Figure 1.** Example showing the process to assign genes to a gene family accounting for 95% of the cumulative probability of bit-scores. The dark grey blocks in both A and B show regions with over 95% cumulative probability. Dots (i.e. hits) falling in the dark grey region are allocated to the gene family. In B, the light grey block denotes a region where hits have similar E-values ( $\Delta E\text{-value} < 10 \times 10^{20}$ ) to the hit with the smallest Bit-score at the 95% border.

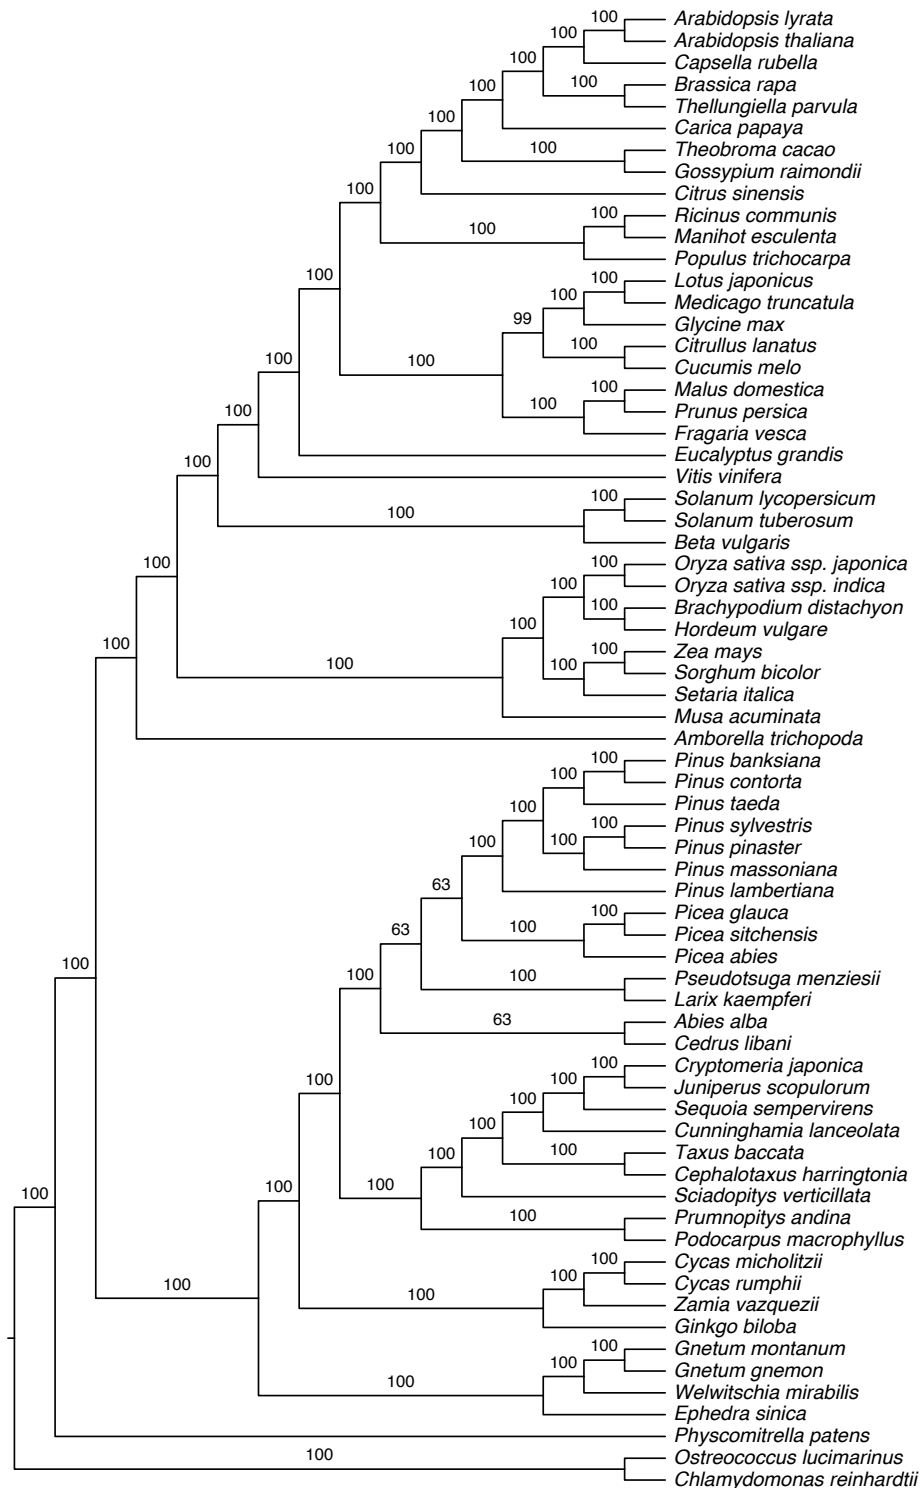

**Supplementary Figure 2.** Maximum likelihood tree inferred from a concatenated alignment of 106 single-copy genes in seed plants including 3<sup>rd</sup> codon positions with one partition. Numbers on branches represent bootstrap values.

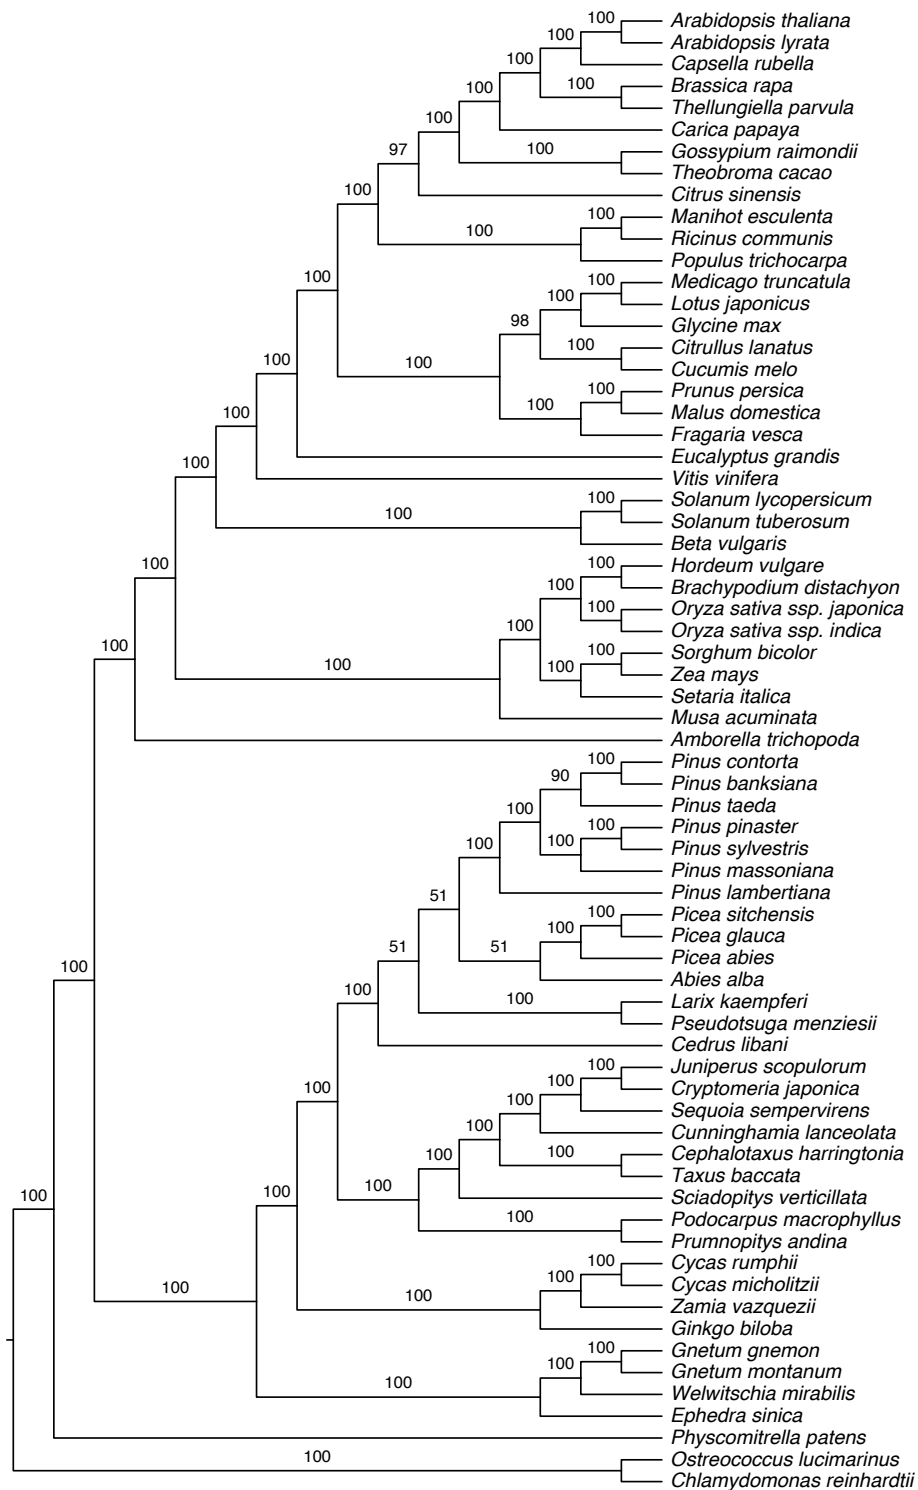

**Supplementary Figure 3.** Maximum likelihood tree inferred from a concatenated alignment of 106 single-copy genes in seed plants including 3<sup>rd</sup> codon positions, but with 1<sup>st</sup> and 2<sup>nd</sup> codon partitions as one partition and 3<sup>rd</sup> codon partition as another. Numbers on branches represent bootstrap values.

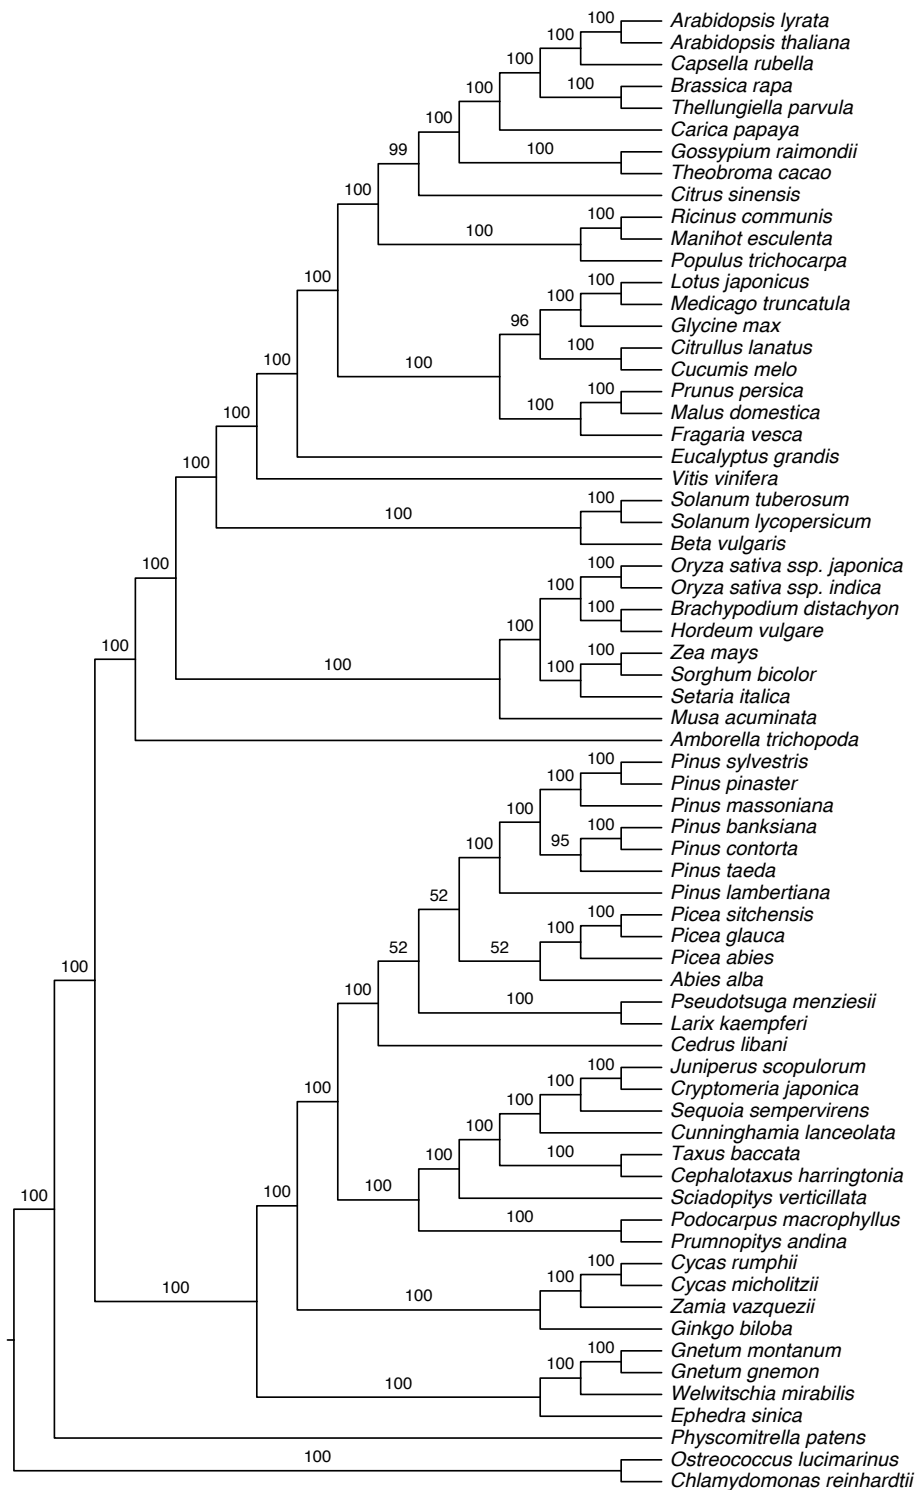

**Supplementary Figure 4.** Maximum likelihood tree inferred from a concatenated alignment of 106 single-copy genes in seed plants including 3<sup>rd</sup> codon positions but with three partitions, i.e. one for each codon position. Numbers on branches represent bootstrap values.

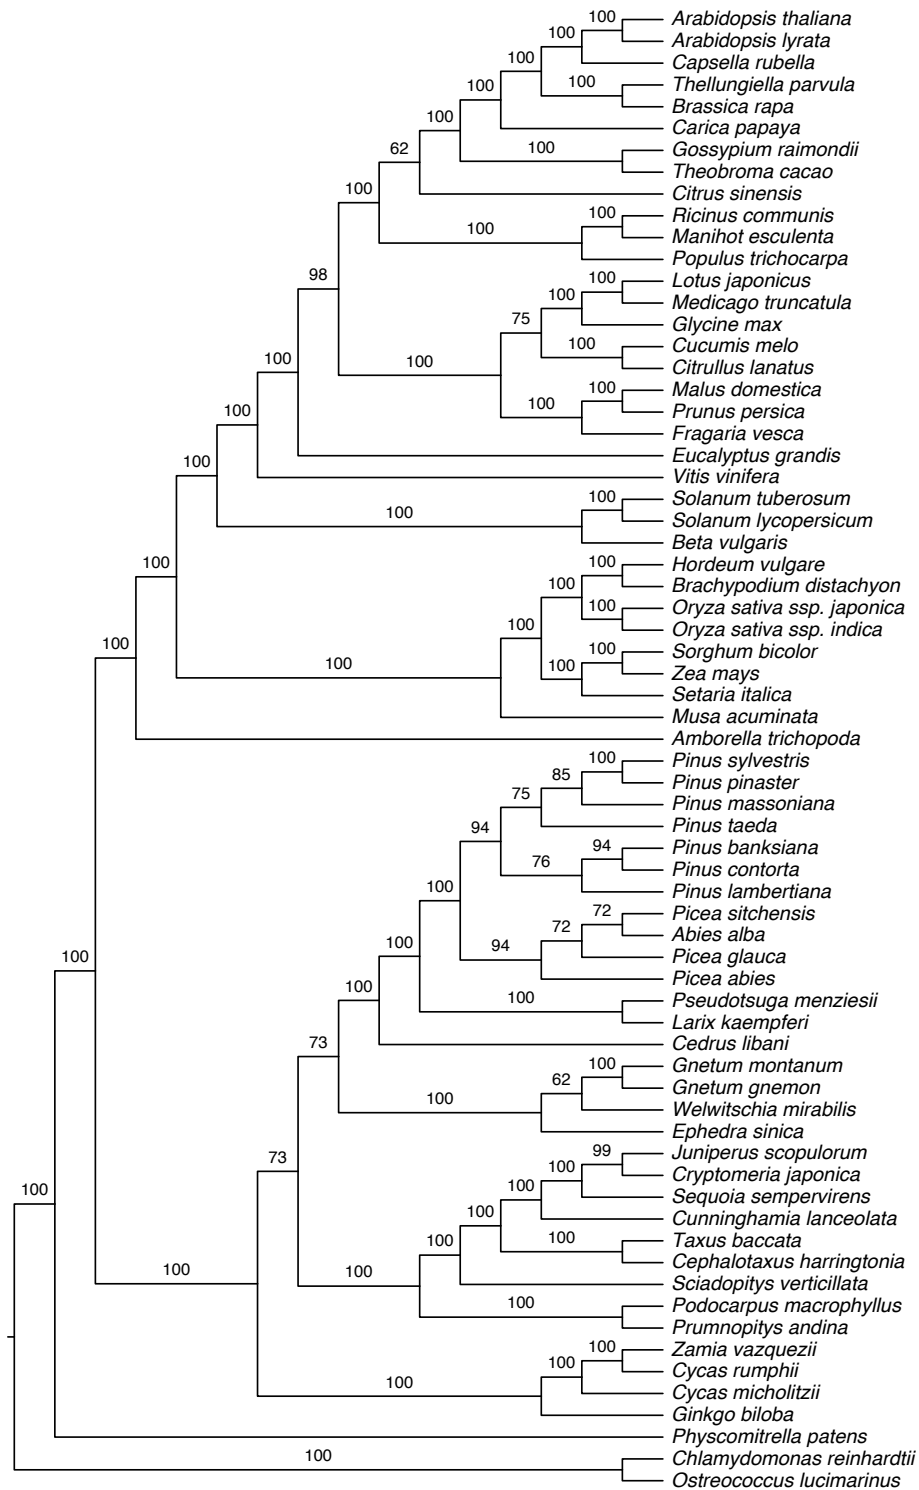

**Supplementary Figure 5.** Maximum likelihood tree inferred from a concatenated alignment of 106 single-copy genes in seed plants with 3<sup>rd</sup> codon positions removed and with position 1 and 2 as one partition. Numbers on branches represent bootstrap values.

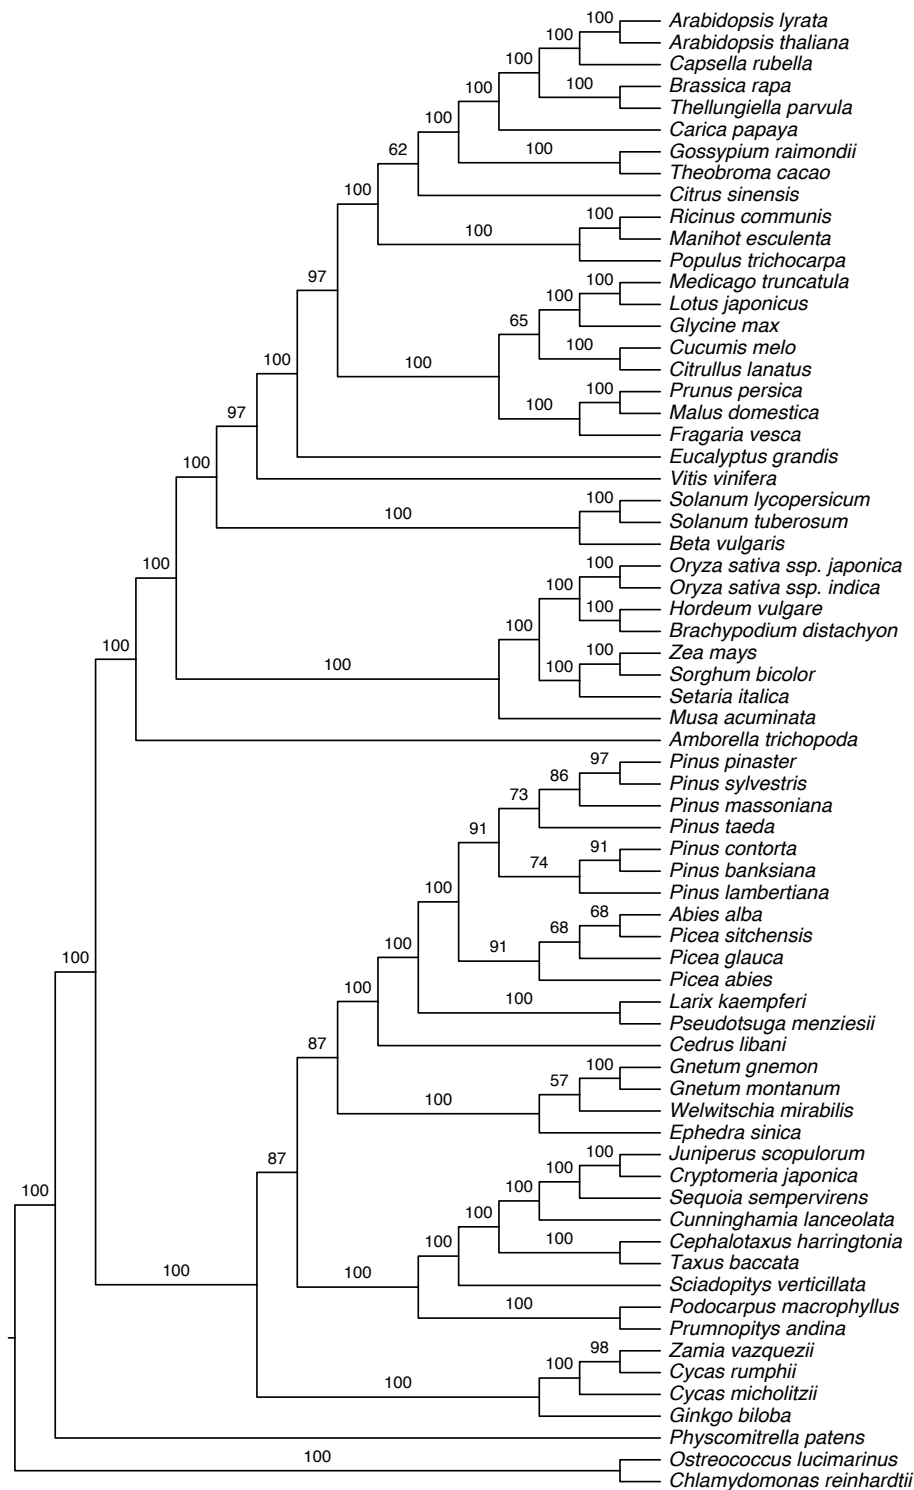

**Supplementary Figure 6.** Maximum likelihood tree inferred from a concatenated alignment of 106 single-copy genes in seed plants with 3<sup>rd</sup> codon positions removed and with position 1 and 2 used as separate partitions. Numbers on branches represent bootstrap values.

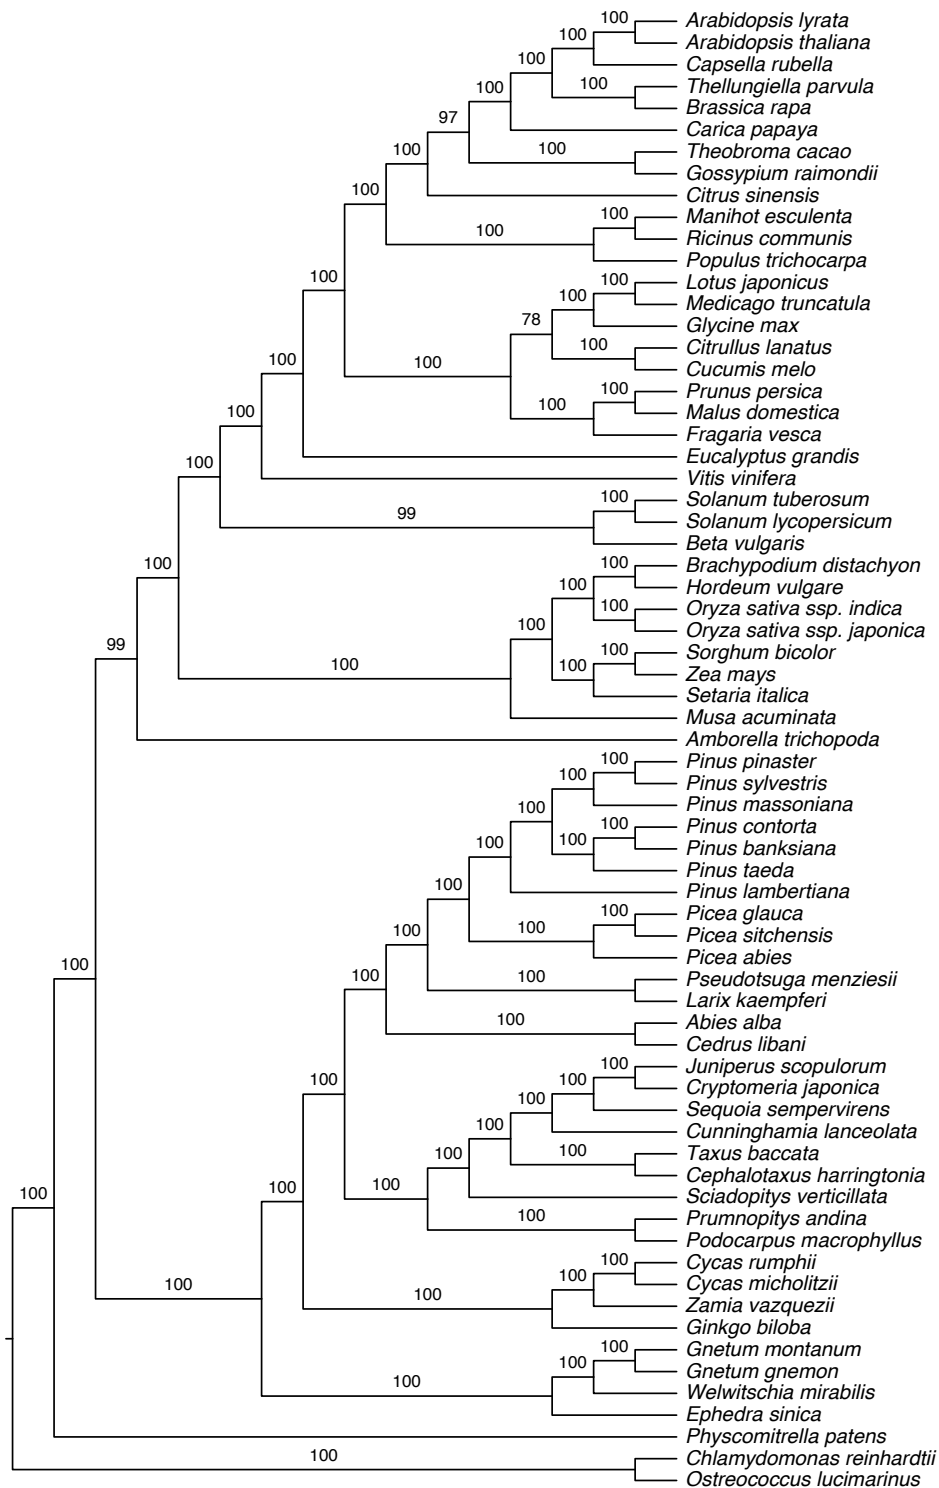

**Supplementary Figure 7.** Maximum likelihood tree inferred from a concatenated alignment of 106 single-copy genes in seed plants only with 3<sup>rd</sup> codon positions. Numbers on branches represent bootstrap values.



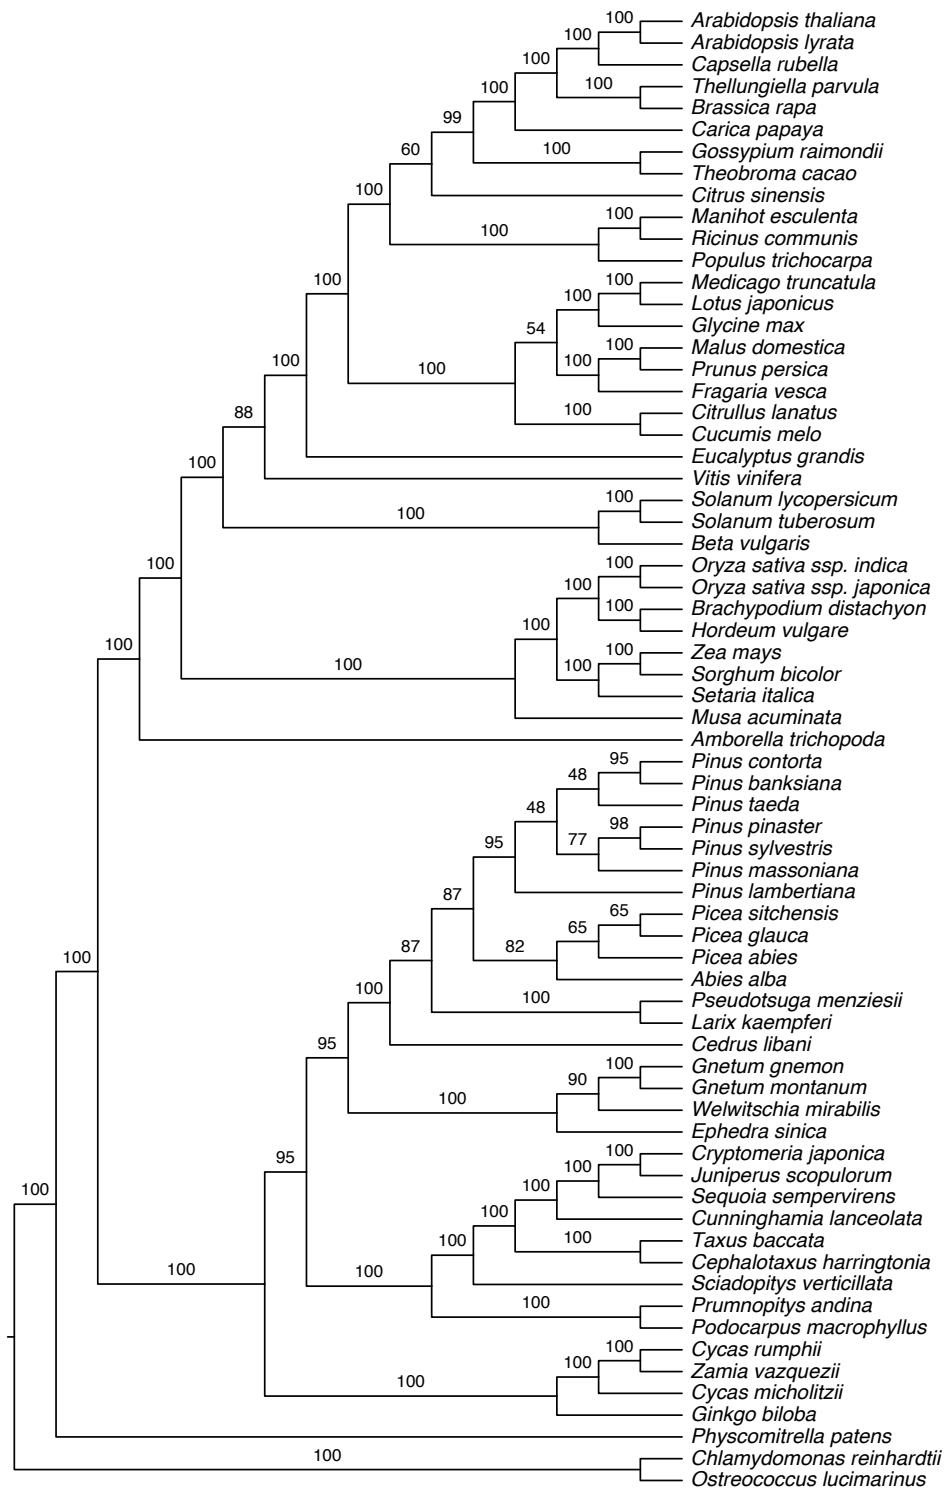

**Supplementary Figure 8.** Maximum likelihood tree inferred from a concatenated alignment of 106 single-copy genes in seed plants only with 1<sup>st</sup> codon positions. Numbers on branches represent bootstrap values.

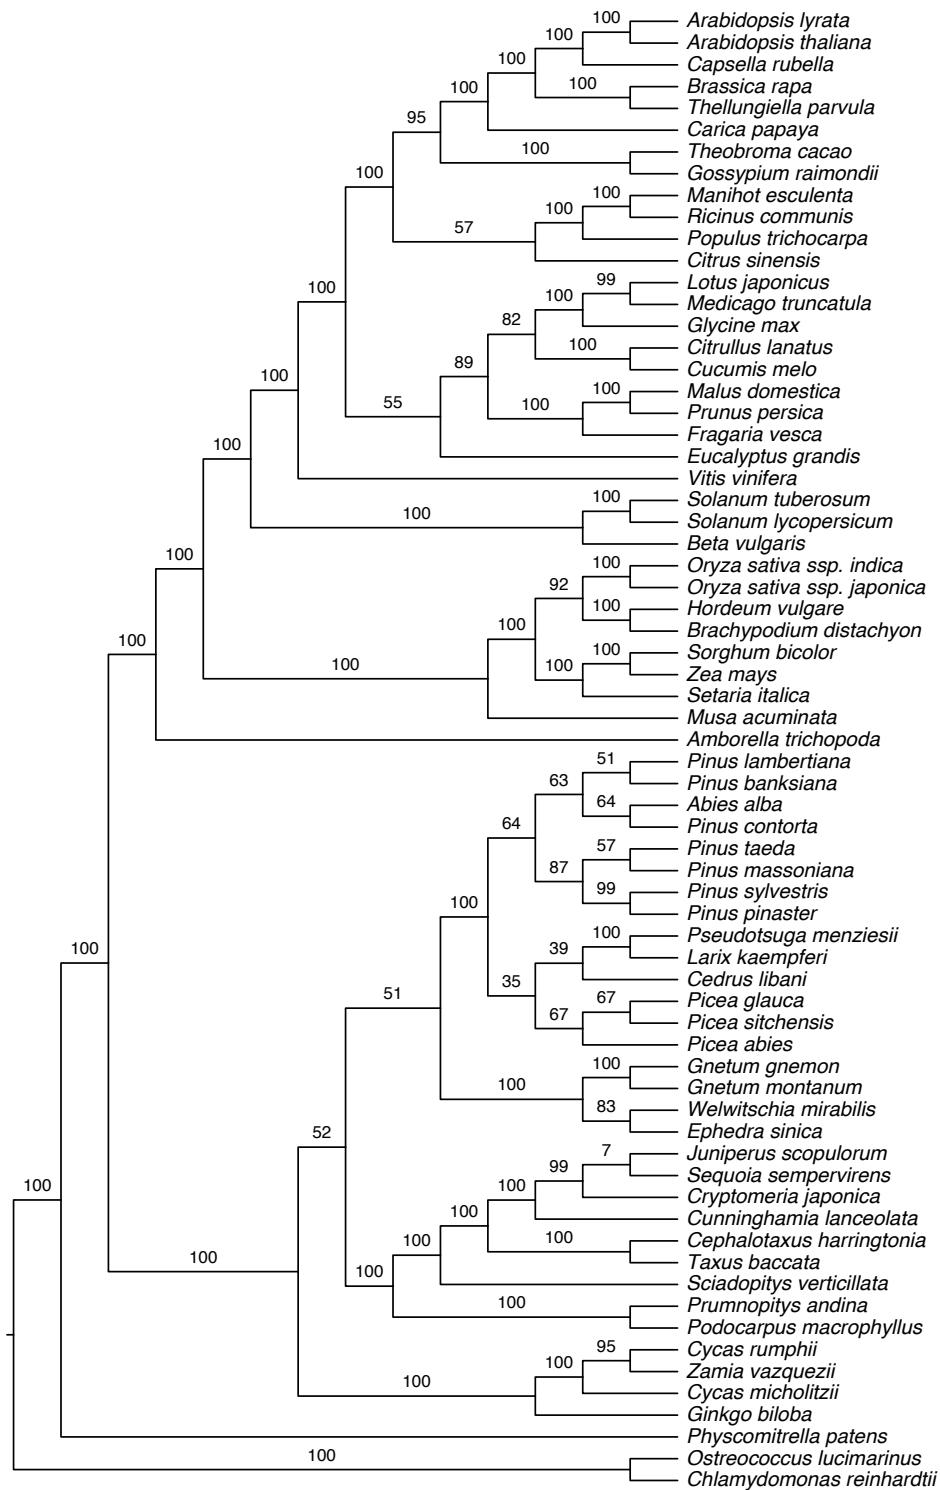

**Supplementary Figure 9.** Maximum likelihood tree inferred from a concatenated alignment of 106 single-copy genes in seed plants only with 2<sup>nd</sup> codon positions. Numbers on branches represent bootstrap values.

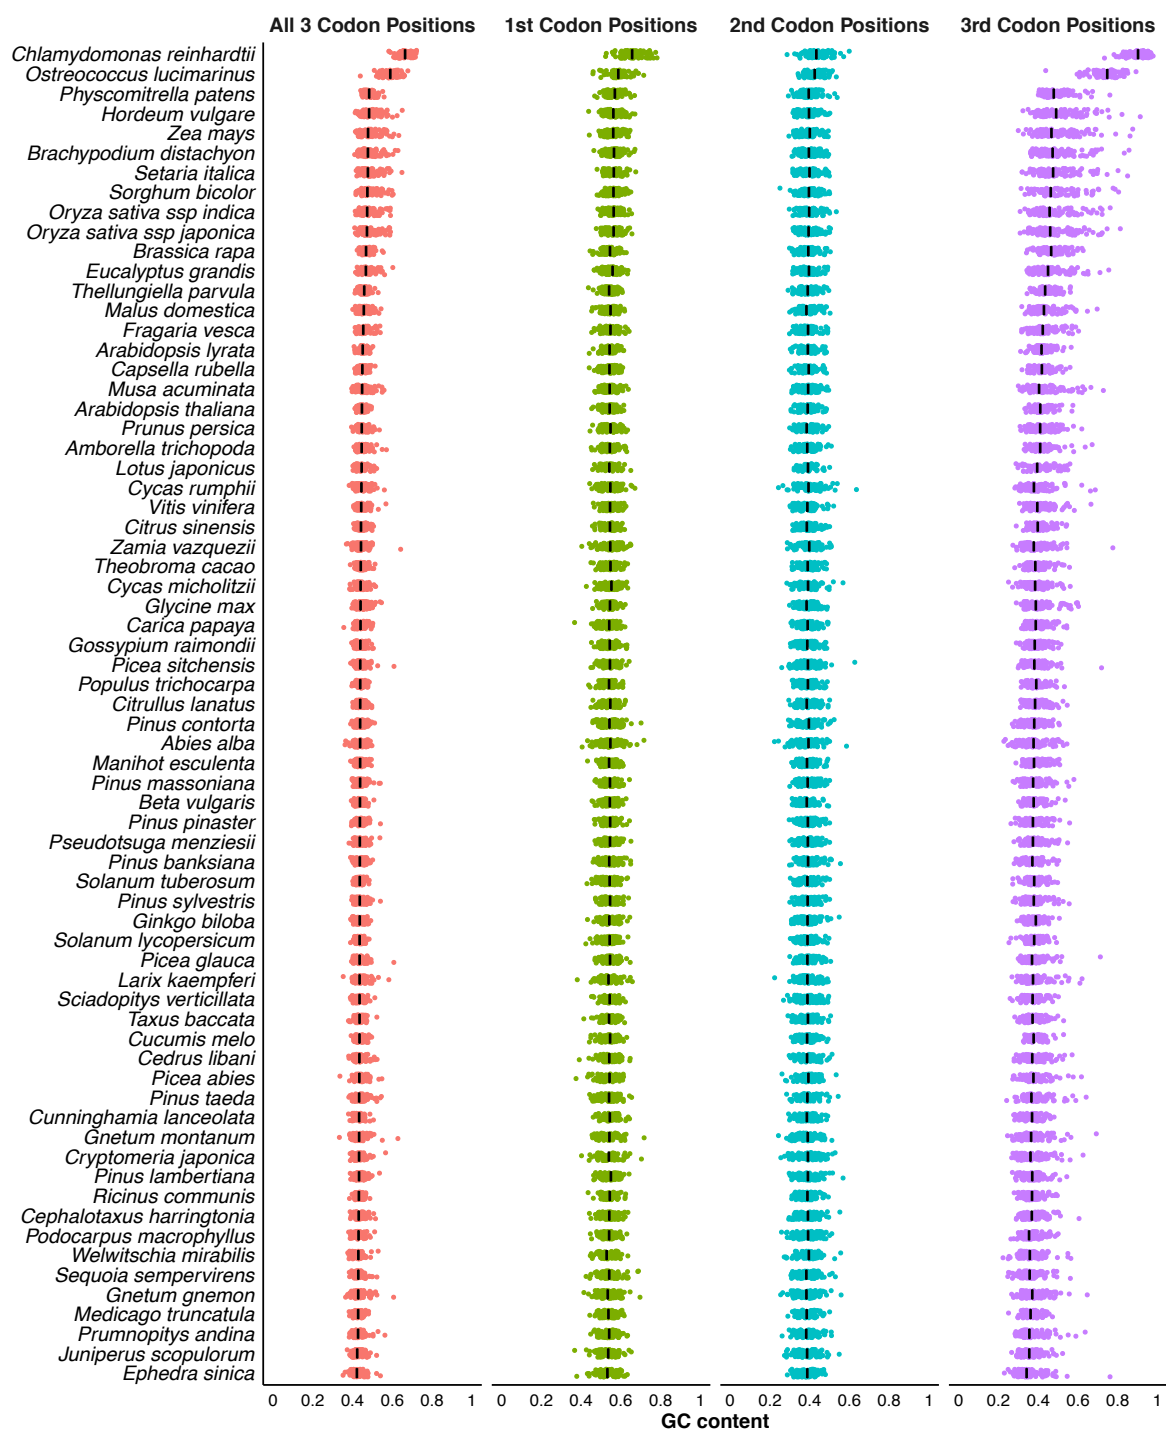

**Supplementary Figure 10.** GC content of the 106 phylogenetic markers at 1<sup>st</sup>, 2<sup>nd</sup>, and 3<sup>rd</sup> codon positions for the species studied.

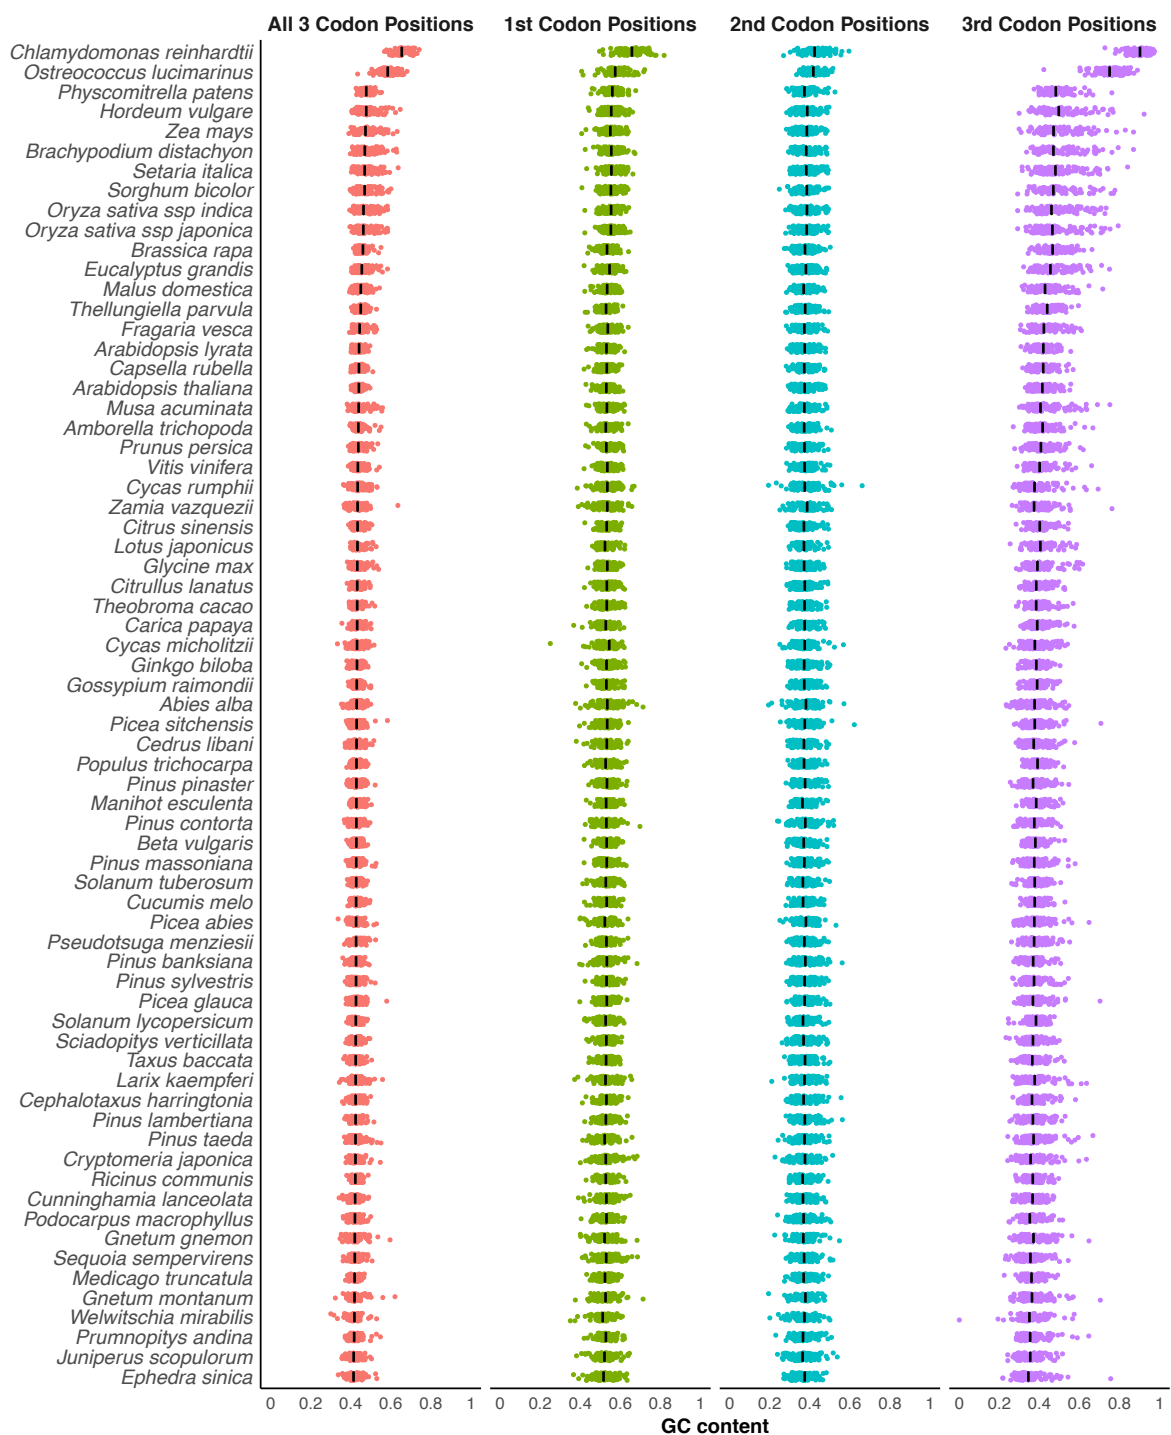

**Supplementary Figure 11.** GC content of the 106 phylogenetic markers at 1<sup>st</sup>, 2<sup>nd</sup>, and 3<sup>rd</sup> codon positions for the species studied after removing sites that encode the same amino acids.

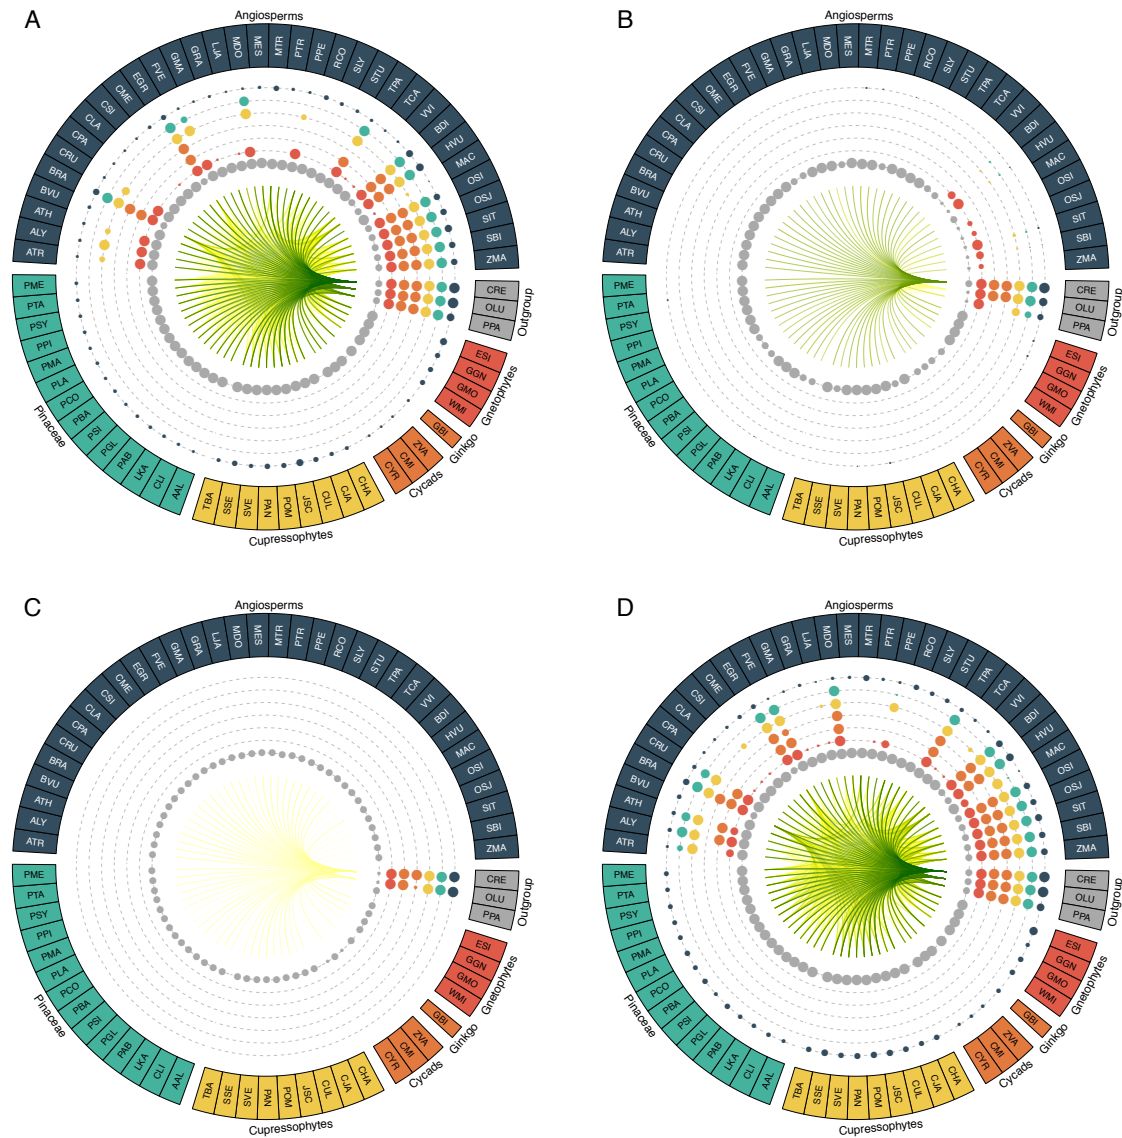

**Supplementary Figure 12.** Comparison of GC content in the concatenated alignment (A) and at each codon position (B, C, and D) from 106 genes in 68 species after removing sites that encode the same amino acids. Dot size correlates with the number of species in each lineage (group) that have a significantly different GC% (Wilcox test,  $P < 1 \times 10^{-3}$ ) with the species compared with (colors of dots correspond to the compared lineages). Lines connecting any two species represent significant difference in GC content, with most significant in green and weakest in yellow ( $1 \times 10^{-3}$ ). The full names for the species can be found in Supplementary Table 3.

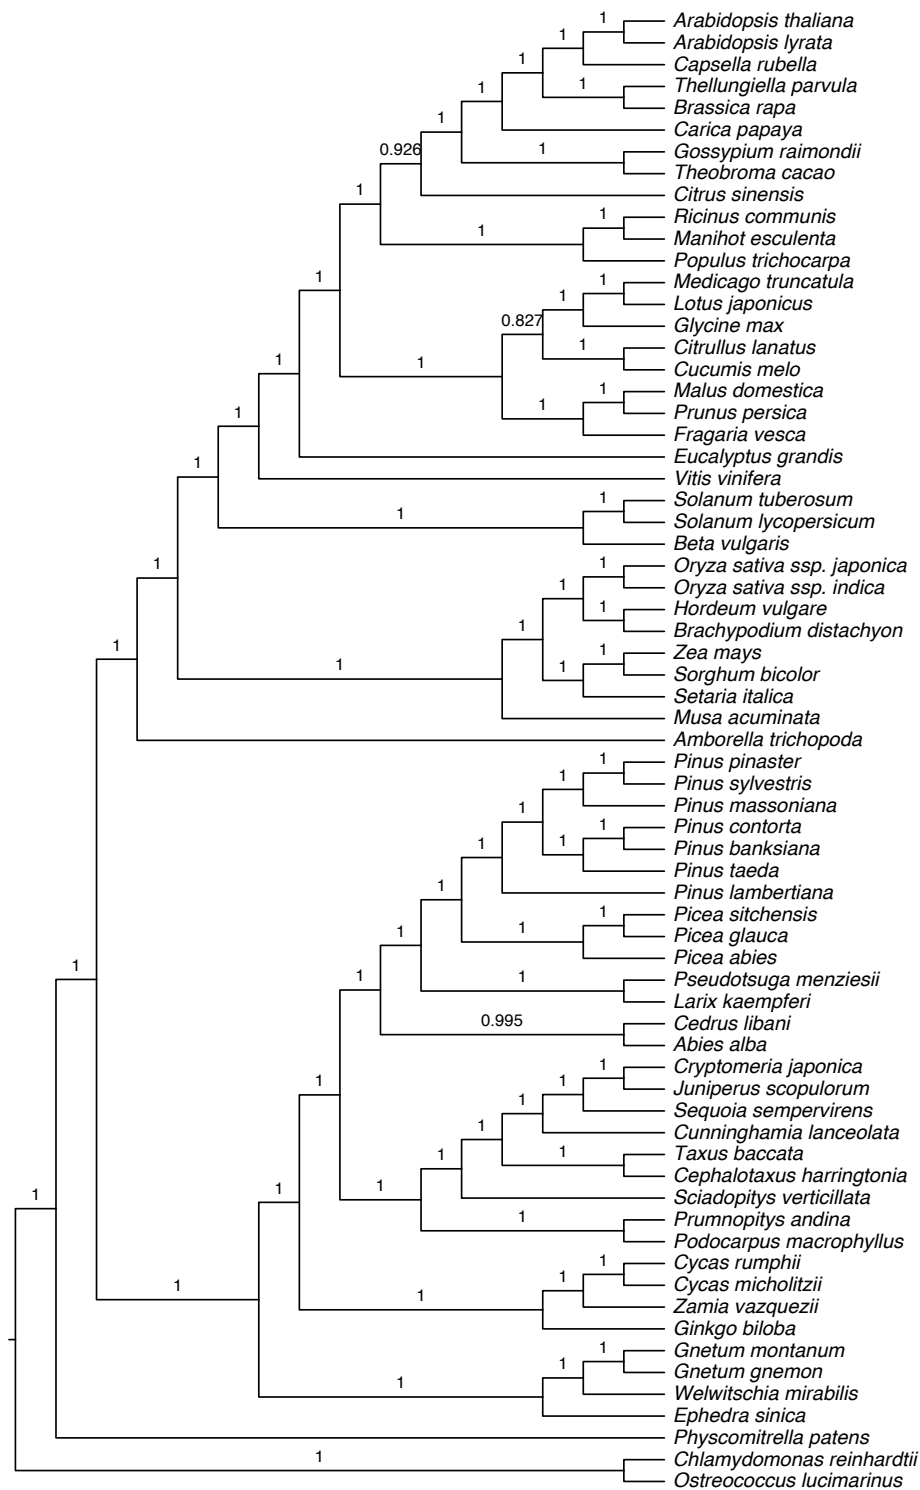

**Supplementary Figure 13.** Maximum likelihood tree inferred from a concatenated codon alignment of 106 single-copy genes using the Goldman and Yang (GY) model. Numbers on branches represent support values from the SH-like approximate likelihood-ratio test.

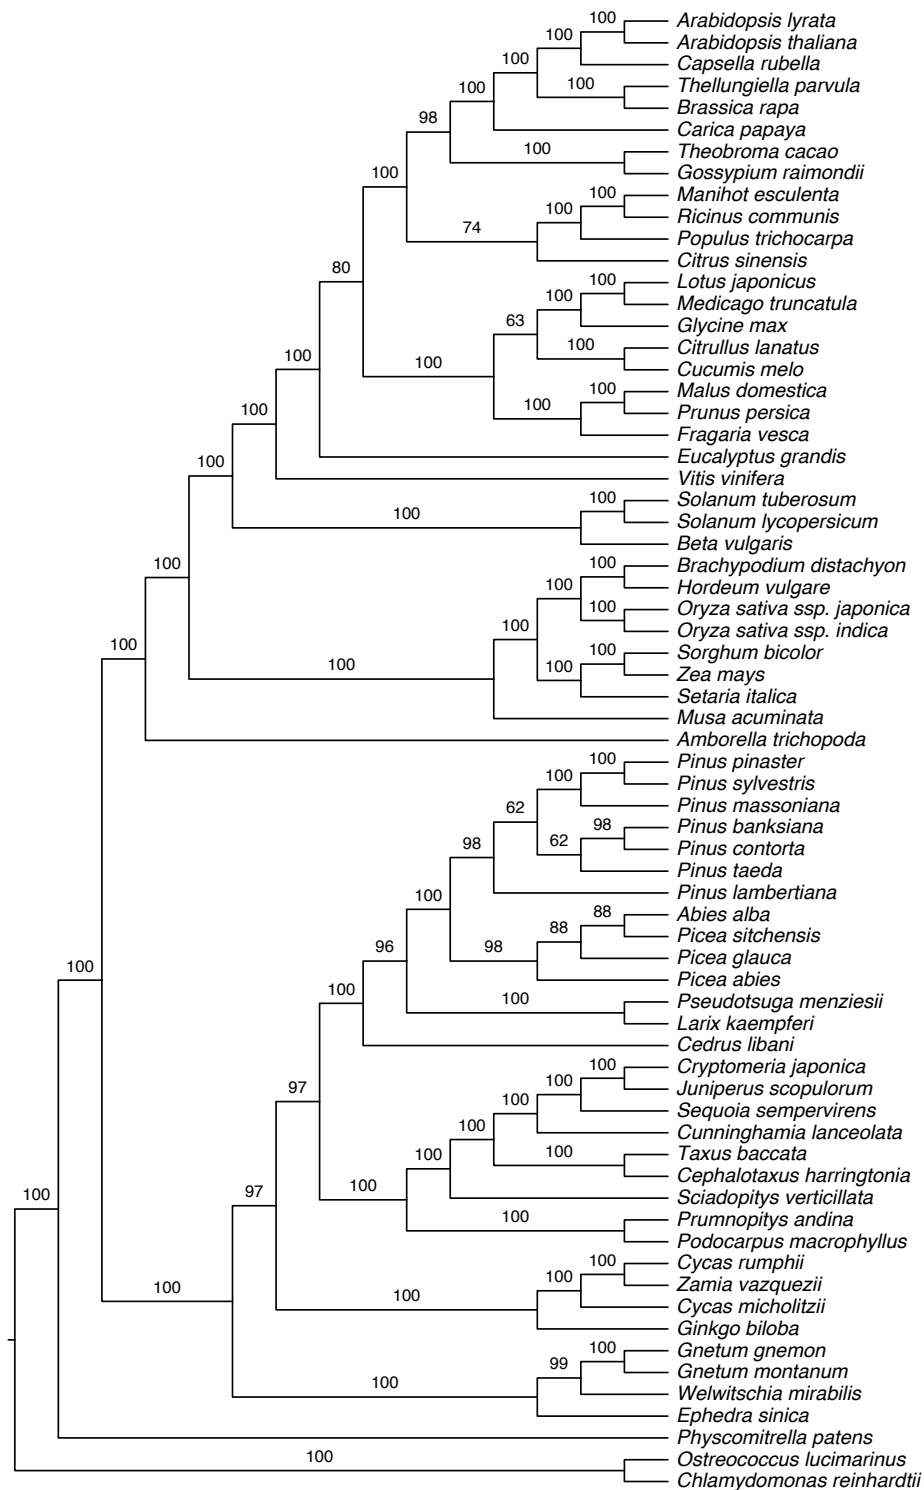

**Supplementary Figure 14.** Maximum likelihood tree inferred from a concatenated amino acid alignment of 106 single-copy genes using the JTT+I+GAMMA+F model. Numbers on branches represent bootstrap values.

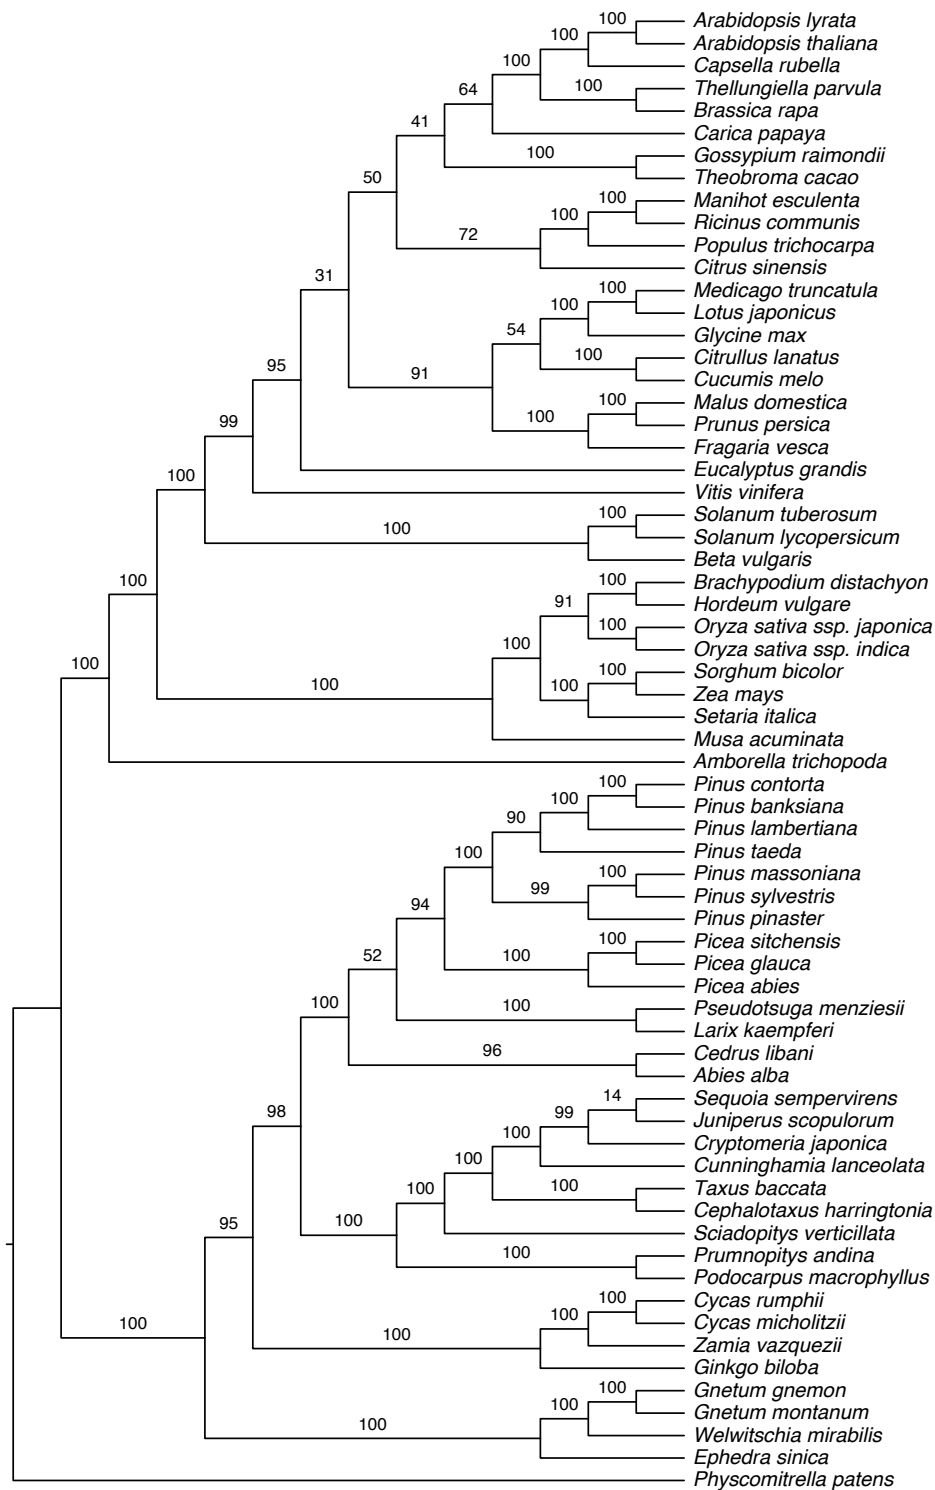

**Supplementary Figure 15.** Maximum likelihood tree inferred from a reduced concatenated amino acid alignment of 106 single-copy genes using the JTT+I+GAMMA+F model. Numbers on branches represent bootstrap values.



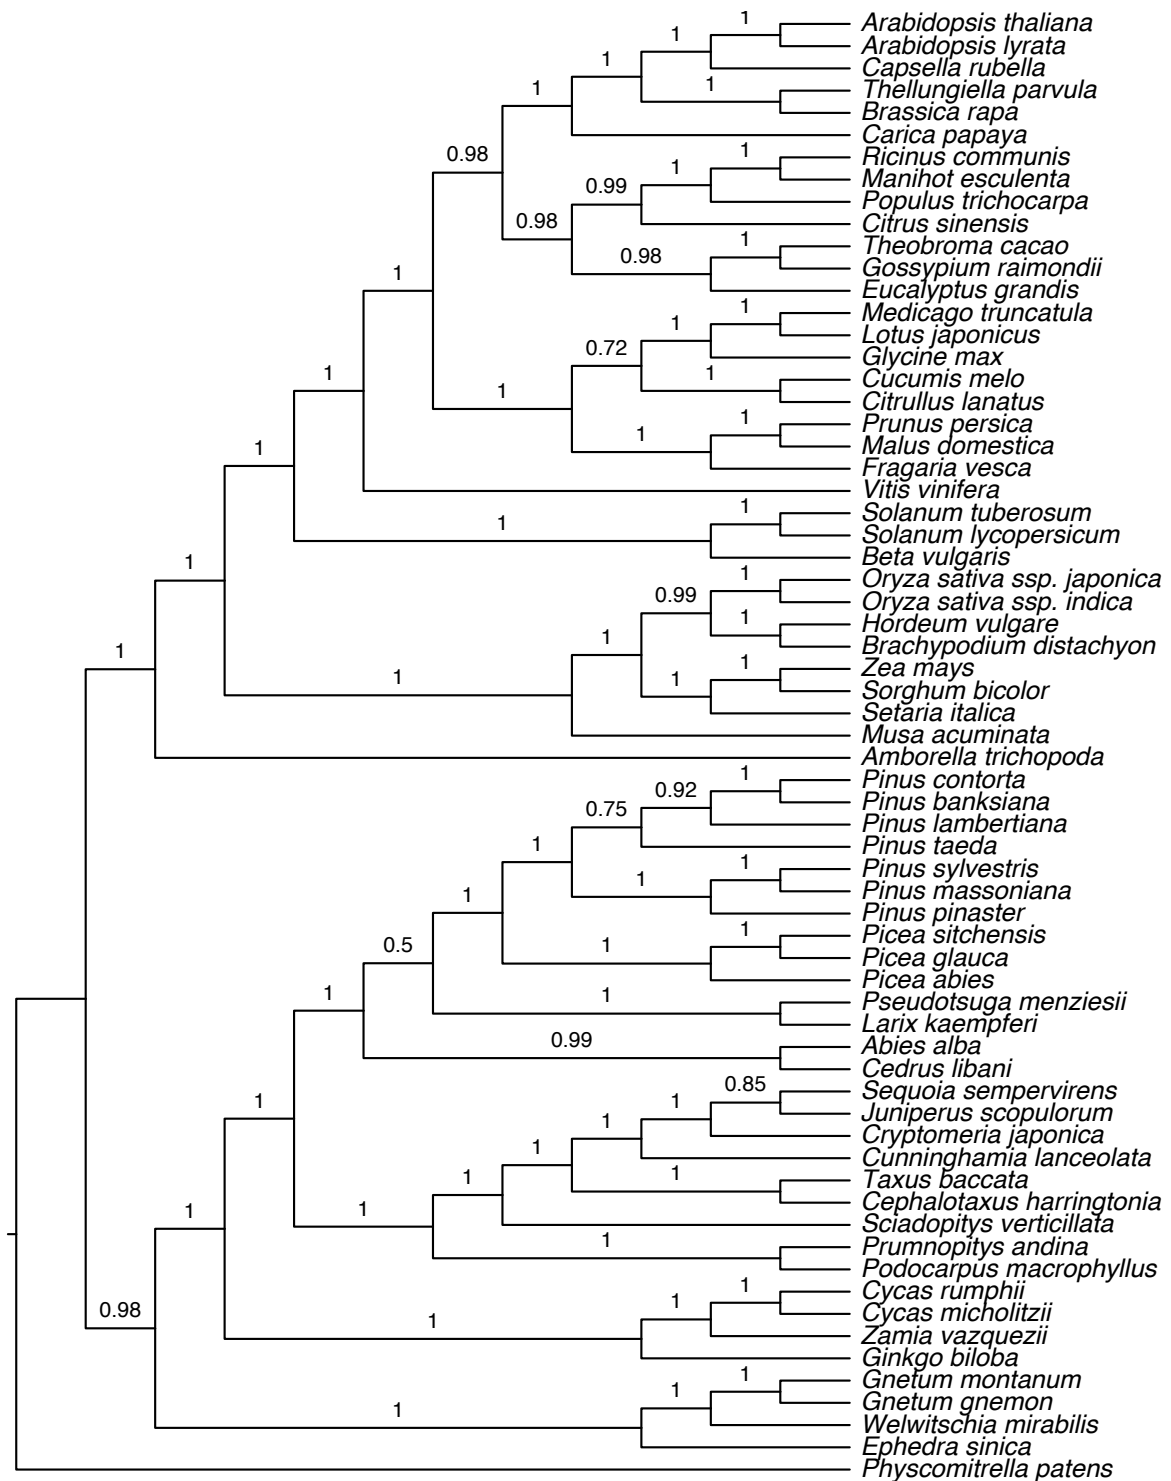

**Supplementary Figure 16.** Bayesian phylogenetic tree based on the reduced amino acid concatenation of 106 single-copy genes under CAT model. Numbers indicate posterior probabilities.

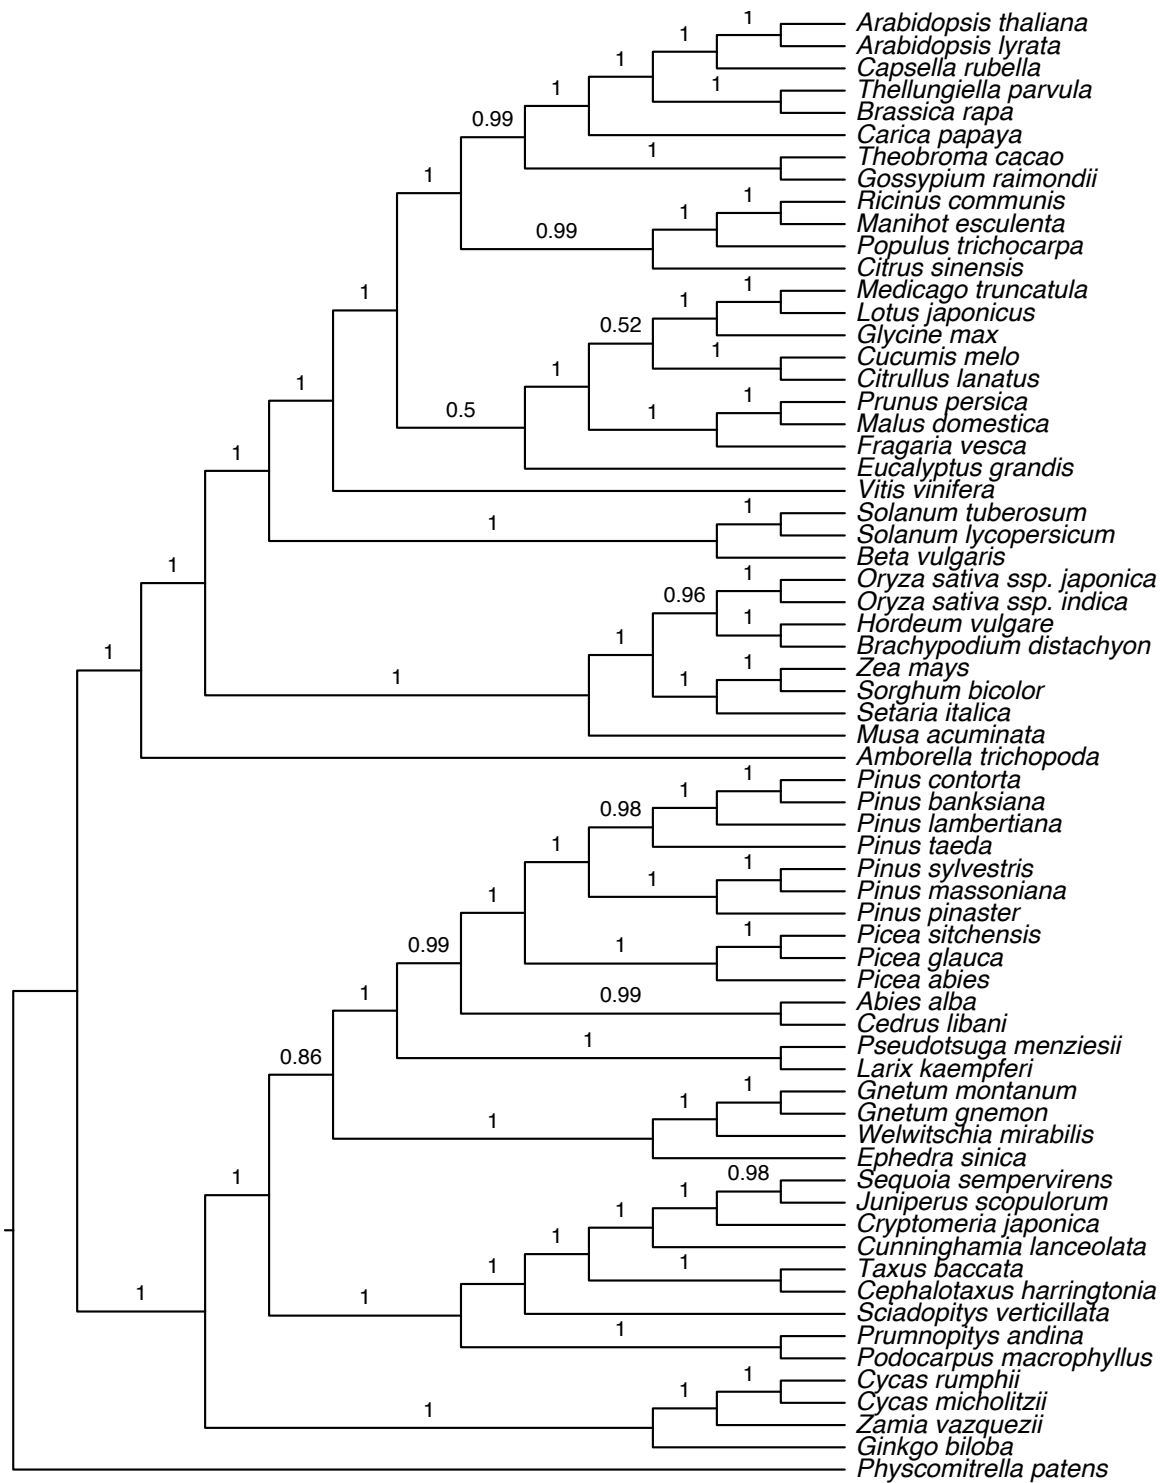

**Supplementary Figure 17.** Bayesian phylogenetic tree based on the reduced amino acid concatenation of 106 single-copy genes under CAT+GTR model. Numbers indicate posterior probabilities.

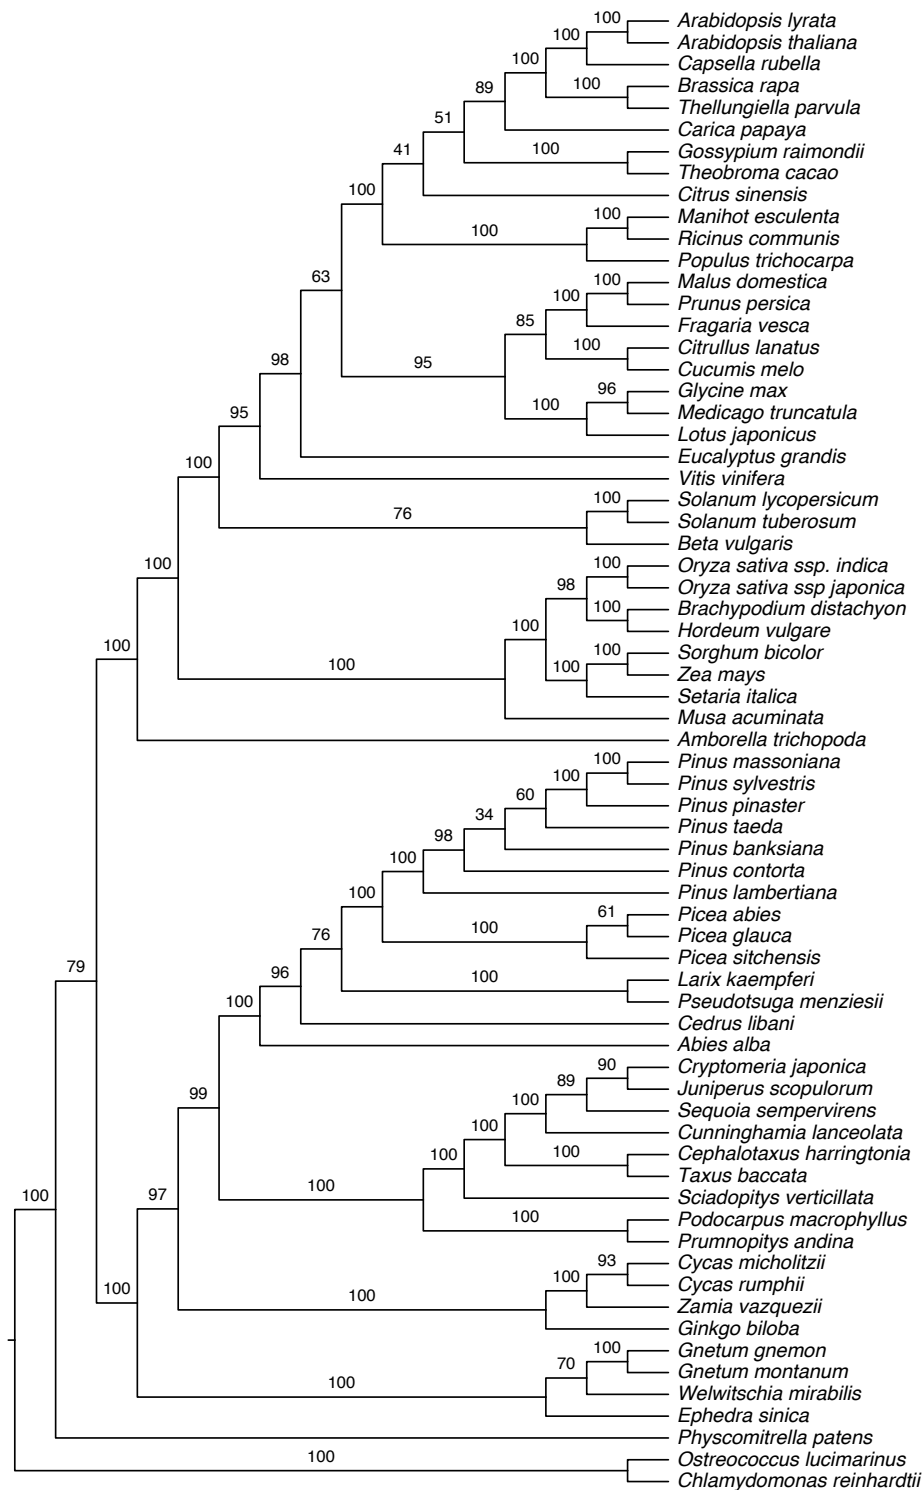

**Supplementary Figure 18.** Coalescent based tree inferred from gene trees of 106 single-copy genes by STAR. Numbers on branches represent bootstrap values.

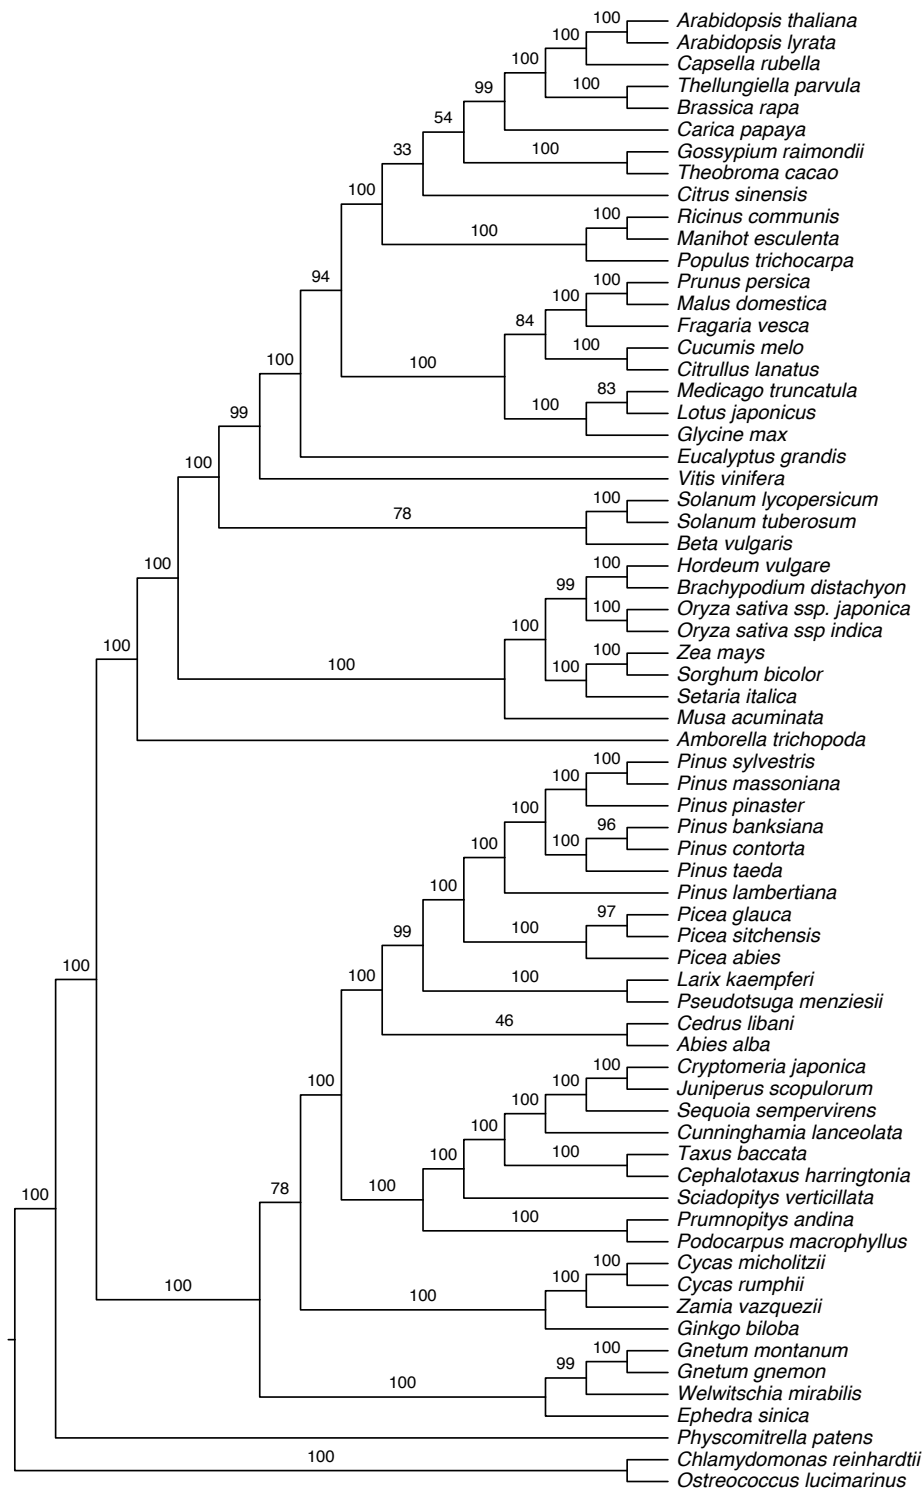

**Supplementary Figure 19.** Coalescent based tree inferred from gene trees of 106 single-copy genes by ASTRA-II. Numbers on branches represent bootstrap values.

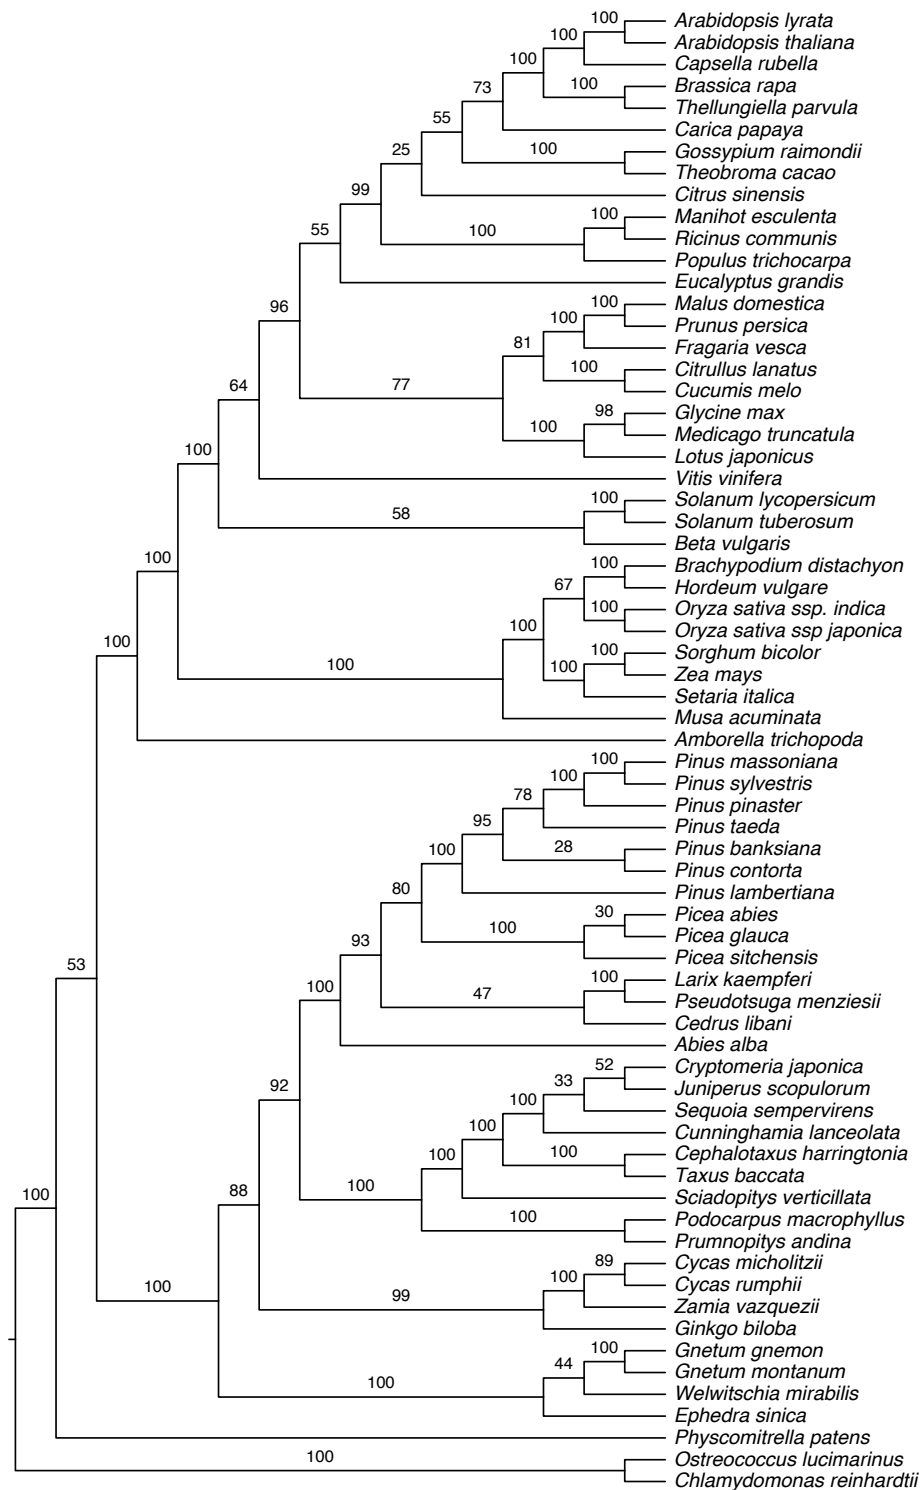

**Supplementary Figure 20.** Coalescent based tree inferred from gene trees of 106 single-copy genes by STAR. Gene trees were built without considering 3<sup>rd</sup> codon positions. Numbers on branches represent bootstrap values.

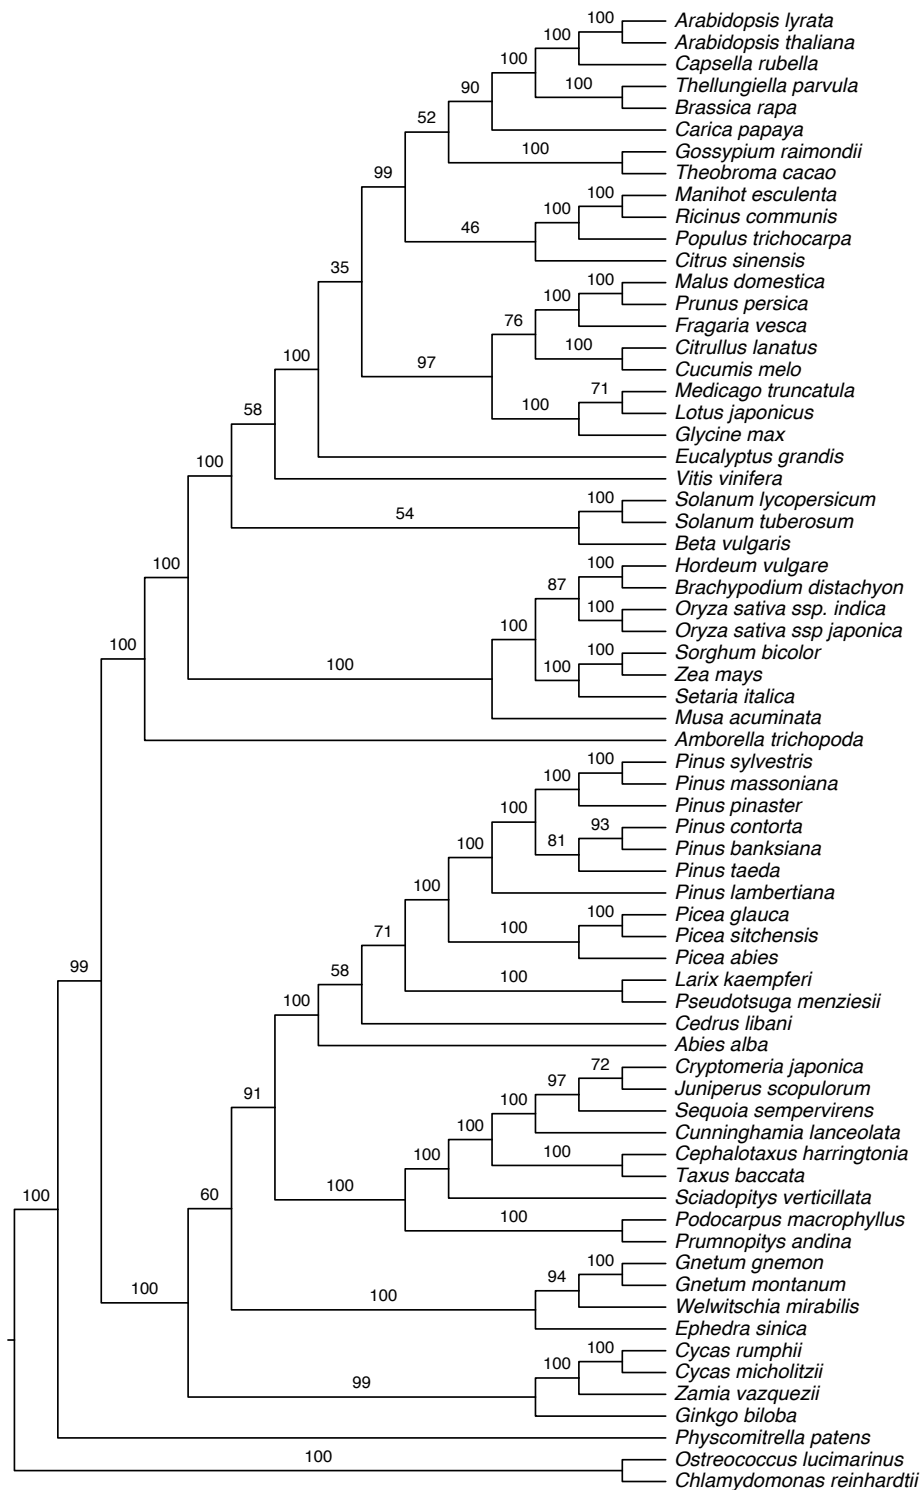

**Supplementary Figure 21.** Coalescent based tree inferred from gene trees of 106 single-copy genes by ASTRAL-II. Gene trees were built without considering 3<sup>rd</sup> codon positions. Numbers on branches represent bootstrap values.

**Supplementary Table 1.** Statistics of the sequencing reads in *Pinus pinaster* and *Pinus sylvestris*

|                         | Tissue                      | Raw Data          | # Reads for Assembly | # Bases for Assembly | % Reads for Assembly |
|-------------------------|-----------------------------|-------------------|----------------------|----------------------|----------------------|
| <i>Pinus pinaster</i>   | Shoot Apical Meristem       | 548,328           | 489,417              | 193,513,935          | 89.26%               |
|                         | Shoot Apical Meristem       | 511,488           | 450,986              | 246,681,796          | 88.17%               |
|                         | Cortex Root                 | 595,575           | 388,906              | 144,683,636          | 65.30%               |
|                         | Cortex Hypocotyl            | 552,098           | 445,605              | 238,646,186          | 80.71%               |
|                         | Pith Hypocotyl              | 238,995           | 177,643              | 34,516,172           | 74.33%               |
|                         | Pith Hypocotyl              | 141,112           | 110,838              | 31,040,865           | 78.55%               |
|                         | Vascular Developing Root    | 596,858           | 511,873              | 351,624,842          | 85.76%               |
|                         | Cortex Developing Root      | 466,708           | 380,969              | 251,267,660          | 81.63%               |
|                         | Root Apical Meristem        | 475,279           | 422,455              | 153,747,617          | 88.89%               |
|                         | Root Apical Meristem        | 605,083           | 535,391              | 338,062,907          | 88.48%               |
|                         | Vascular Root               | 297,094           | 173,094              | 78,592,365           | 58.26%               |
|                         | Vascular Root               | 448,120           | 262,767              | 129,947,819          | 58.64%               |
|                         | Vascular Cotyledon          | 726,853           | 663,607              | 424,191,066          | 91.30%               |
|                         | Mesophyll Cotyledon         | 776,974           | 720,010              | 460,528,808          | 92.67%               |
|                         | Pith Hypocotyl              | 631,059           | 573,629              | 353,808,071          | 90.90%               |
|                         | Vascular New Needle         | 747,050           | 691,860              | 472,097,944          | 92.61%               |
|                         | Vascular Hypocotyl          | 678,337           | 607,026              | 363,679,917          | 89.49%               |
|                         | Developing Needle           | 747,508           | 702,247              | 460,245,151          | 93.95%               |
|                         | Mesophyll New Needle        | 682,094           | 601,778              | 328,943,737          | 88.23%               |
|                         | Vascular Root               | 712,551           | 673,643              | 335,482,084          | 94.54%               |
|                         | PPIN_454_Reads_Reg1.RL6.sff | 493,631           | 394,947              | 151,121,677          | 80.01%               |
|                         | PPIN_454_Reads_Reg2.RL6.sff | 724,677           | 562,481              | 212,858,345          | 77.62%               |
|                         | <b>Total</b>                | <b>12,397,472</b> | <b>10,541,172</b>    | <b>5,755,282,600</b> | <b>85.03%</b>        |
| <i>Pinus sylvestris</i> | Early Embryo (E1)           | 603,508           | 539,840              | 250,762,894          | 89.45%               |
|                         | Cleavage (E2)               | 625,195           | 573,611              | 279,768,670          | 91.75%               |
|                         | Dominant Embryo (E3DO)      | 749,430           | 711,685              | 506,198,526          | 94.96%               |
|                         | Megagametophyte (E3SU)      | 745,590           | 708,247              | 499,030,847          | 94.99%               |
|                         | Dominant Embryo (E4)        | 817,722           | 780,954              | 552,917,241          | 95.50%               |
|                         | Subordinate Embryos (M1)    | 758,018           | 725,345              | 512,694,678          | 95.69%               |
|                         | Megagametophyte (M2)        | 712,754           | 671,451              | 465,102,991          | 94.21%               |
|                         | Megagametophyte (M3)        | 800,707           | 768,722              | 521,997,230          | 96.01%               |
|                         | Megagametophyte (M4)        | 789,571           | 754,048              | 516,959,353          | 95.50%               |
|                         | <b>Total</b>                | <b>6,602,495</b>  | <b>6,233,903</b>     | <b>4,105,432,430</b> | <b>94.42%</b>        |

**Supplementary Table 2.** Integrated transcriptomes for gymnosperms from public databases

| <b>Species</b>                   | <b>TreeGenes*</b> | <b>PlantGDB**</b> | <b>oneKP</b> | <b>#<br/>Transcripts</b> | <b>#<br/>Proteins</b> |
|----------------------------------|-------------------|-------------------|--------------|--------------------------|-----------------------|
| <i>Abies alba</i>                | 25,419            | -                 | -            | 20,796                   | 17,279                |
| <i>Cedrus libani</i>             | -                 | -                 | 70,595       | 65,491                   | 37,730                |
| <i>Cephalotaxus harringtonia</i> | 13,997            | -                 | -            | 13,927                   | 16,578                |
| <i>Cryptomeria japonica</i>      | 347               | 24,299            | -            | 21,922                   | 19,688                |
| <i>Cunninghamia lanceolata</i>   | 62,140            | -                 | 68,622       | 70,761                   | 48,057                |
| <i>Cycas micholitzii</i>         | -                 | -                 | 54,202       | 51,130                   | 28,901                |
| <i>Cycas rumphii</i>             | -                 | 10,901            | 22,908       | 21,844                   | 12,619                |
| <i>Ephedra sinica</i>            | -                 | -                 | 57,134       | 51,088                   | 26,873                |
| <i>Ginkgo biloba</i>             | -                 | 10,210            | 48,343       | 45,631                   | 30,404                |
| <i>Gnetum gnemon</i>             | 10,221            | 6,193             | -            | 12,994                   | 14,889                |
| <i>Gnetum montanum</i>           | -                 | -                 | 70,316       | 65,123                   | 32,549                |
| <i>Juniperus scopulorum</i>      | -                 | -                 | 61,299       | 57,857                   | 35,004                |
| <i>Larix kaempferi</i>           | 57,484            | -                 | -            | 53,274                   | 40,692                |
| <i>Pinus banksiana</i>           | 16                | 13,040            | -            | 12,036                   | 13,421                |
| <i>Pinus contorta</i>            | 32                | 13,570            | -            | 12,605                   | 14,984                |
| <i>Pinus lambertiana</i>         | 19,509            | -                 | -            | 19,292                   | 20,561                |
| <i>Pinus massoniana</i>          | 69,738            | -                 | -            | 55,525                   | 46,423                |
| <i>Podocarpus macrophyllus</i>   | 12,266            | -                 | -            | 12,209                   | 14,296                |
| <i>Prumnopitys andina</i>        | -                 | -                 | 45,616       | 42,269                   | 30,894                |
| <i>Pseudotsuga menziesii</i>     | 393,638           | 9,857             | -            | 246,282                  | 149,717               |
| <i>Sciadopitys verticillata</i>  | 11,955            | -                 | 51,723       | 40,310                   | 30,035                |
| <i>Sequoia sempervirens</i>      | 11,517            | -                 | -            | 11,462                   | 13,461                |
| <i>Taxus baccata</i>             | 10,554            | -                 | 54,249       | 44,059                   | 32,062                |
| <i>Welwitschia mirabilis</i>     | -                 | -                 | 6,606        | 6,261                    | 6,052                 |
| <i>Zamia vazquezii</i>           | -                 | 7,657             | 50,336       | 33,979                   | 24,619                |

\* TreeGenes includes ESTs, cDNAs, TSAs, and 454 assemblies

\*\**Cycas rumphii*, *Ginkgo biloba*, *Gnetum gnemon*, and *Zamia vazquezii* are directly from PlantGDB



**Supplementary Table 3.** The short name and clade of species used in the current study.

| <b>Species</b>                   | <b>Short name</b> | <b>Clade</b>   |
|----------------------------------|-------------------|----------------|
| <i>Cephalotaxus harringtonia</i> | CHA               | Cupressophytes |
| <i>Cryptomeria japonica</i>      | CJA               | Cupressophytes |
| <i>Cunninghamia lanceolata</i>   | CUL               | Cupressophytes |
| <i>Juniperus scopulorum</i>      | JSC               | Cupressophytes |
| <i>Podocarpus macrophyllus</i>   | POM               | Cupressophytes |
| <i>Prumnopitys andina</i>        | PAN               | Cupressophytes |
| <i>Sciadopitys verticillata</i>  | SVE               | Cupressophytes |
| <i>Sequoia sempervirens</i>      | SSE               | Cupressophytes |
| <i>Taxus baccata</i>             | TBA               | Cupressophytes |
| <i>Zamia vazquezii</i>           | ZVA               | Cycads         |
| <i>Cycas micholitzii</i>         | CMI               | Cycads         |
| <i>Cycas rumphii</i>             | CYR               | Cycads         |
| <i>Amborella trichopoda</i>      | ATR               | Angiosperms    |
| <i>Arabidopsis lyrata</i>        | ALY               | Angiosperms    |
| <i>Arabidopsis thaliana</i>      | ATH               | Angiosperms    |
| <i>Beta vulgaris</i>             | BVU               | Angiosperms    |
| <i>Brassica rapa</i>             | BRA               | Angiosperms    |
| <i>Capsella rubella</i>          | CRU               | Angiosperms    |
| <i>Carica papaya</i>             | CPA               | Angiosperms    |
| <i>Citrullus lanatus</i>         | CLA               | Angiosperms    |
| <i>Citrus sinensis</i>           | CSI               | Angiosperms    |
| <i>Cucumis melo</i>              | CME               | Angiosperms    |
| <i>Eucalyptus grandis</i>        | EGR               | Angiosperms    |
| <i>Fragaria vesca</i>            | FVE               | Angiosperms    |
| <i>Glycine max</i>               | GMA               | Angiosperms    |
| <i>Gossypium raimondii</i>       | GRA               | Angiosperms    |
| <i>Lotus japonicus</i>           | LJA               | Angiosperms    |
| <i>Malus domestica</i>           | MDO               | Angiosperms    |
| <i>Manihot esculenta</i>         | MES               | Angiosperms    |
| <i>Medicago truncatula</i>       | MTR               | Angiosperms    |
| <i>Populus trichocarpa</i>       | PTR               | Angiosperms    |
| <i>Prunus persica</i>            | PPE               | Angiosperms    |
| <i>Ricinus communis</i>          | RCO               | Angiosperms    |
| <i>Solanum lycopersicum</i>      | SLY               | Angiosperms    |
| <i>Solanum tuberosum</i>         | STU               | Angiosperms    |
| <i>Thellungiella parvula</i>     | TPA               | Angiosperms    |
| <i>Theobroma cacao</i>           | TCA               | Angiosperms    |
| <i>Vitis vinifera</i>            | VVI               | Angiosperms    |
| <i>Ginkgo biloba</i>             | GBI               | Ginkgo         |
| <i>Ephedra sinica</i>            | ESI               | Gnetophytes    |

| Species                          | Short name | Clade       |
|----------------------------------|------------|-------------|
| <i>Gnetum gnemon</i>             | GGN        | Gnetophytes |
| <i>Gnetum montanum</i>           | GMO        | Gnetophytes |
| <i>Welwitschia mirabilis</i>     | WMI        | Gnetophytes |
| <i>Brachypodium distachyon</i>   | BDI        | Angiosperms |
| <i>Hordeum vulgare</i>           | HVU        | Angiosperms |
| <i>Musa acuminata</i>            | MAC        | Angiosperms |
| <i>Oryza sativa ssp indica</i>   | OSI        | Angiosperms |
| <i>Oryza sativa ssp japonica</i> | OSJ        | Angiosperms |
| <i>Setaria italica</i>           | SIT        | Angiosperms |
| <i>Sorghum bicolor</i>           | SBI        | Angiosperms |
| <i>Zea mays</i>                  | ZMA        | Angiosperms |
| <i>Chlamydomonas reinhardtii</i> | CRE        | Outgroup    |
| <i>Ostreococcus lucimarinus</i>  | OLU        | Outgroup    |
| <i>Physcomitrella patens</i>     | PPA        | Outgroup    |
| <i>Abies alba</i>                | AAL        | Pinaceae    |
| <i>Cedrus libani</i>             | CLI        | Pinaceae    |
| <i>Larix kaempferi</i>           | LKA        | Pinaceae    |
| <i>Picea abies</i>               | PAB        | Pinaceae    |
| <i>Picea glauca</i>              | PGL        | Pinaceae    |
| <i>Picea sitchensis</i>          | PSI        | Pinaceae    |
| <i>Pinus banksiana</i>           | PBA        | Pinaceae    |
| <i>Pinus contorta</i>            | PCO        | Pinaceae    |
| <i>Pinus lambertiana</i>         | PLA        | Pinaceae    |
| <i>Pinus massoniana</i>          | PMA        | Pinaceae    |
| <i>Pinus pinaster</i>            | PPI        | Pinaceae    |
| <i>Pinus sylvestris</i>          | PSY        | Pinaceae    |
| <i>Pinus taeda</i>               | PTA        | Pinaceae    |
| <i>Pseudotsuga menziesii</i>     | PME        | Pinaceae    |
